# Supplementary material
Source: PubMed Central journal article supplement (PMC4794991)
Supplement: NIHMS375939-supplement-1_si_001.pdf [file NIHMS375939-supplement-1_si_001.pdf]

# Outer-Sphere Contributions to the Electronic Structure of Type Zero Copper Proteins

## Supporting Information

*Kyle M. Lancaster, María-Eugenia Zaballa, Stephen Sproules, Mahesh Sundararajan,  
Serena DeBeer, John H. Richards, Alejandro J. Vila, Frank Neese, and Harry B. Gray*

### Table of Contents

#### *Tables*

|                          |    |
|--------------------------|----|
| Table S1. EPR Conditions | S2 |
|--------------------------|----|

#### *Figures*

|                                            |    |
|--------------------------------------------|----|
| Figure S1. QM/MM Partitioning              | S3 |
| Figure S2. Full MCD spectra                | S4 |
| Figure S3. QM/MM Optimized Active Sites    | S5 |
| Figure S4. Experimental and Calculated XAS | S6 |
| Figure S5. SORCI MCD Spectra               | S7 |

#### *Input Coordinates (XYZ) for Calculations*

|                                               |     |
|-----------------------------------------------|-----|
| Wild-type Azurin: X-ray Diffraction           | S7  |
| Wild-type Azurin: QM/MM                       | S9  |
| C112D Azurin: X-ray Diffraction               | S11 |
| C112D Azurin: QM/MM Bidentate                 | S13 |
| C112D Azurin: QM/MM Monodentate               | S15 |
| C112D Azurin: SORCI (QM/MM Bidentate)         | S17 |
| C112D/M121L Azurin: X-ray Diffraction         | S17 |
| C112D/M121L Azurin: QM/MM Bidentate           | S19 |
| C112D/M121L Azurin: QM/MM Monodentate         | S21 |
| C112D/M121L Azurin: SORCI (QM/MM Monodentate) | S23 |
| C112D/M121F Azurin: X-ray Diffraction         | S24 |
| C112D/M121F Azurin: QM/MM Bidentate           | S26 |
| C112D/M121F Azurin: QM/MM Monodentate         | S28 |
| C112D/M121F Azurin: SORCI (QM/MM Monodentate) | S30 |

## Tables

**Table S1.** Experimental conditions, linewidth ( $W_i$ ,  $10^{-4}$  cm $^{-1}$ ) and  $g$ - and  $A$ -strain coefficients ( $\sigma_{g_i}/\sigma_{A_i}$ ) for frozen solution S-, X-, and Q-band EPR measurements

|             | frequency <sup>a</sup> | power <sup>b</sup> | modulation <sup>c</sup> | $T^d$ | $W_x$ | $W_y$ | $W_z$ | $\sigma_{g_x}$ | $\sigma_{g_y}$ | $\sigma_{g_z}$ | $\sigma_{A_x}$ | $\sigma_{A_y}$ | $\sigma_{A_z}$ |
|-------------|------------------------|--------------------|-------------------------|-------|-------|-------|-------|----------------|----------------|----------------|----------------|----------------|----------------|
|             | 3.6940                 | 9.74               | 0.2                     | 20    | 1     | 4     | 5     | -<br>0.0024    | 0.001          | 0.0023         | 1              | 2              | -8             |
| C112D       | 9.3758                 | 2.04               | 0.5                     | 77    | 3.4   | 29    | 11    | 0.0            | 0.0026         | 0.0034         | 0              | 12             | -9             |
|             | 34.086                 | 0.98               | 1.5                     | 50    | 10    | 3     | 41    | 0.002          | 0.0043         | 0.0015         | 0              | 0              | -15            |
|             | 3.7190                 | 9.69               | 0.2                     | 20    | 9     | 80    | 10    | 0.009          | 0.010          | 0.008          | 10             | 10             | -3             |
| C112D/M121L | 9.3750                 | 6.42               | 0.5                     | 77    | 22    | 10    | 14    | 0.013          | 0.015          | 0.006          | 12             | 15             | -5             |
|             | 34.109                 | 2.02               | 1.5                     | 50    | 0     | 26    | 44    | 0.0044         | 0.010          | 0.004          | 0              | 0              | -7             |
|             | 3.7150                 | 9.74               | 0.2                     | 20    | 8     | 9     | 5     | 0.017          | 0.008          | 0.004          | 10             | 10             | -11            |
| C112D/M121F | 9.3749                 | 6.45               | 0.5                     | 77    | 8     | 8     | 7     | 0.014          | 0.008          | 0.007          | 3              | 3              | -6             |
|             | 34.092                 | 2.02               | 1.5                     | 50    | 18    | 24    | 50    | 0.0049         | 0.008          | 0.0024         | 0              | 0              | -15            |

<sup>a</sup>In GHz. <sup>b</sup> In mW. <sup>c</sup>In mT. <sup>d</sup> In K.

## Figures

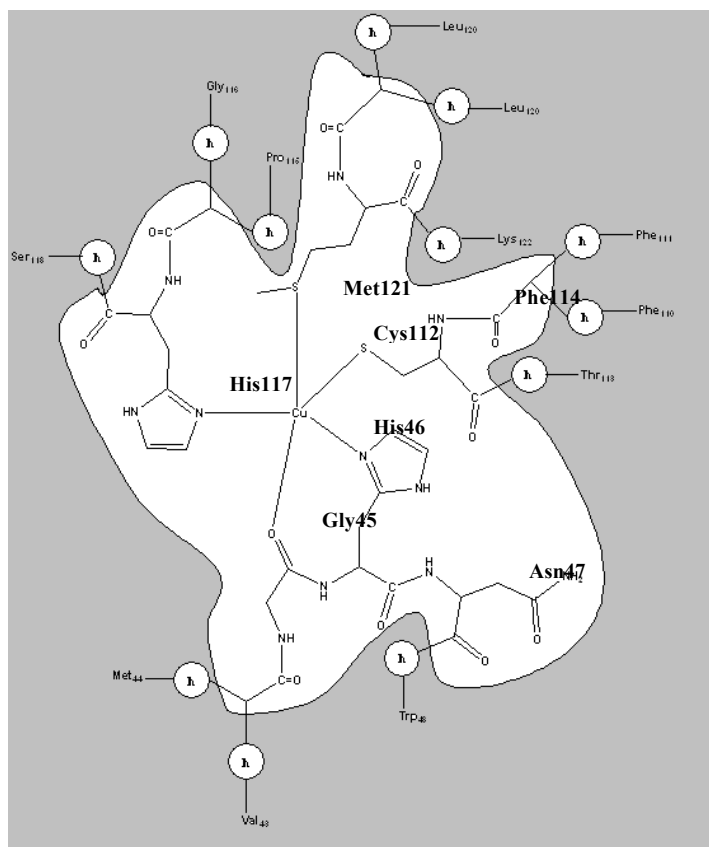

**Figure S1.** QM/MM partitioning for active site optimizations of wild-type azurin. The QM region is enveloped in white and included residues 45, 46, 47, 112, 114, 117, and 121. The surrounding gray area comprised the MM region. Analogous partitioning was employed for C112D and C112D/M121L,F azurins.

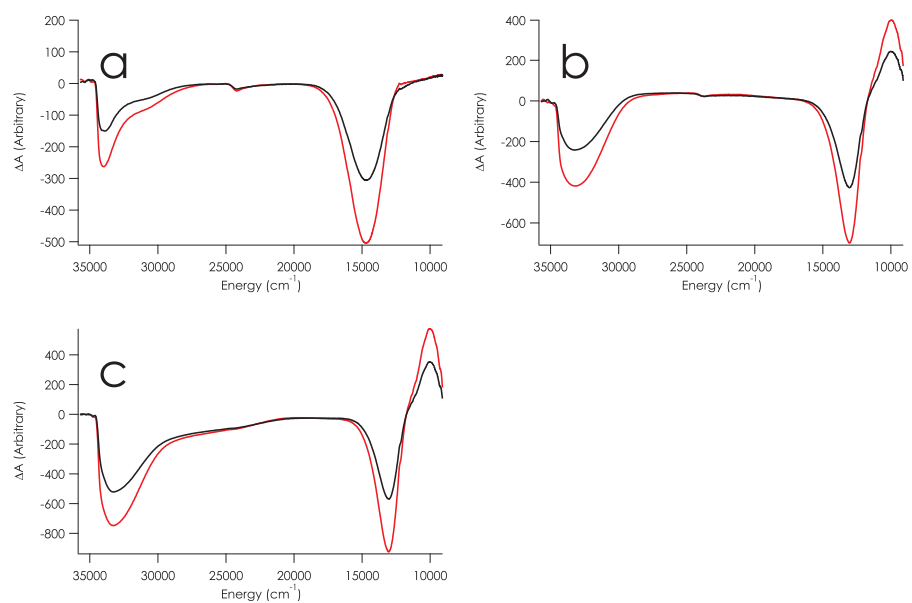

**Figure S2.** MCD spectra of (a) C112D, (b) C112D/M121L, and (c) C112D/M121F azurins. MCD spectra were recorded at a magnetic field strength of 7 T at 10 K (black) and 5.3 K (red) in 50 mM HEPES pH 7.0 containing 50% glycerol. Inverse temperature dependence of the circular dichroism indicates that all observed features are C-terms.

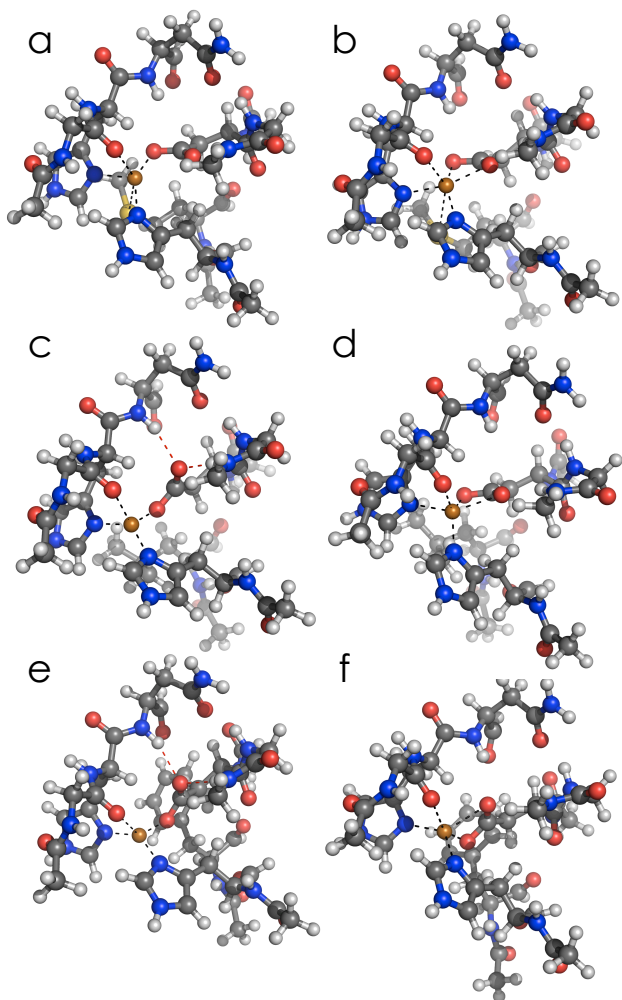

**Figure S3.** QM/MM optimized active sites. a) C112D monodentate, b) C112D bidentate, c) C112D/M121L monodentate, d) C112D/M121L bidentate, e) C112D/M121F monodentate, f) C112D/M121F bidentate. Inner-sphere coordination is indicated by black dashed lines, outer-sphere coordination is indicated by red dashed lines.

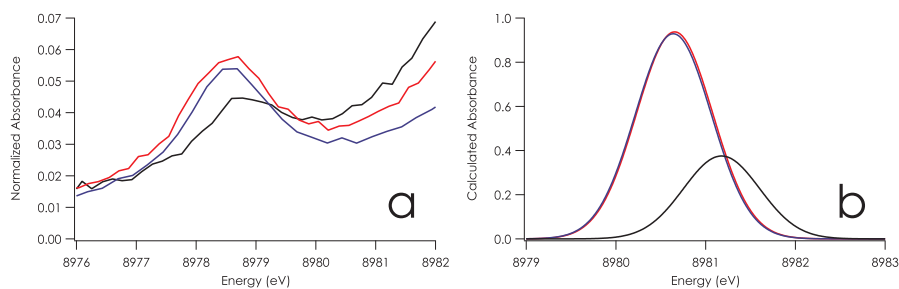

**Figure S4.** Experimental (a) and calculated (b) Cu K-edge XAS for C112D (black) and C112D/M121X (X = L, red; F, blue) from TDDFT calculations. Spectra were calculated using the B3LYP functional with the SV(P) basis set and ZORA. The ~8979 eV pre-edge feature in Cu K-edge XAS spectra arises from  $1s \rightarrow 3d$  excitations that are formally forbidden in octahedral symmetry, but gain intensity upon tetrahedral site distortion. The intensity of this pre-edge feature has been used as a measure of 4p admixture into the  $\psi_{x^2-y^2}$  SOMO. Integrated peak areas for the C112D/M121L and C112D/M121F pre-edge

features are 0.091 and 0.081, respectively. These data have been previously reported, though their discussion was primarily qualitative.<sup>11</sup> The corresponding LF peak in the C112D spectrum is far less intense, having an area of 0.025. Thus, C112D/M121F has a pre-edge feature with 0.9 times the absorbance of C112D/M121L, and C112D has a pre-edge feature with 0.27 times the absorbance of C112D/M121L. The pre-edge features are isoenergetic at 8978.5 eV in the type zero spectra. In the C112D spectrum the feature shifts to higher energy at 8978.7 eV. Calculated XAS spectra using the QM/MM bidentate C112D and crystallographic type zero coordinates are in agreement with experiment. Integrated areas are 1.00 and 0.99 for C112D/M121L and C112D/M121F, respectively. The lower intensity of the C112D protein is reproduced; it integrates to 0.40 units. Calculated absorbance areas require a scaling factor; for our purposes noting that the absorbance ratios trend in accord with experiment is satisfactory. The shift to higher energy is overestimated by 0.5 eV.

Unknown

Field Code Changed

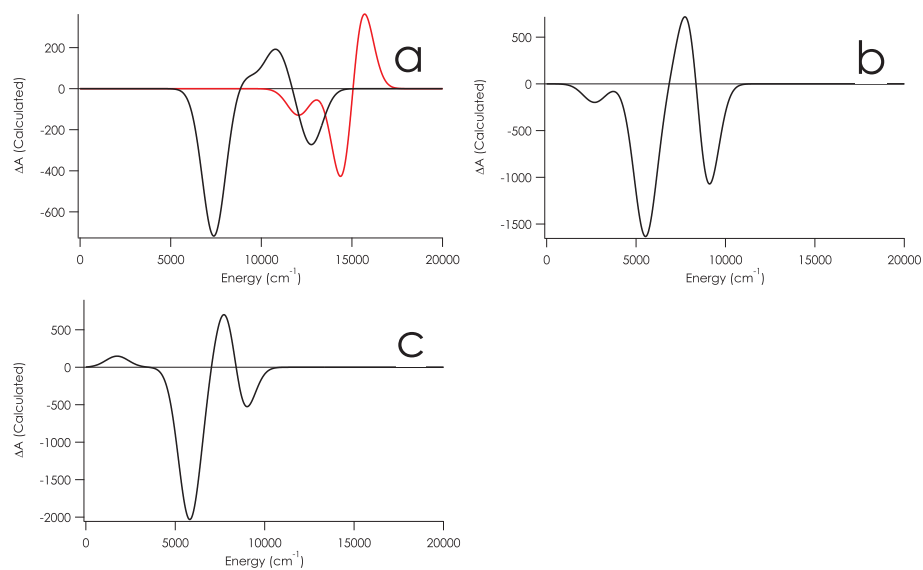

**Figure S5.** SORCI-MCD calculations of C112D (a, black = crystal, red = QM/MM), and C112D/M121X (X = L, b; F, c) azurins.

### Input Coordinates (XYZ) for Calculations

#### Wild-type Azurin: X-ray Diffraction

```

C 2.542797 5.153864 5.697064
C 1.705299 5.714590 4.544079
O 0.475220 5.755975 4.624187
N 2.284791 6.219131 3.449127
C 1.483332 6.682889 2.315236
C 0.682409 5.547989 1.662478
O 1.110031 4.394232 1.676595
N -0.510372 5.826962 1.132444
C -1.318347 4.832033 0.445581
C -1.862794 5.456831 -0.831244
O -2.106413 6.660660 -0.886267
C -2.535673 4.372951 1.268053
C -2.198242 3.709077 2.597761
N -1.273827 2.778677 2.732068
C -2.748272 4.059624 3.793127
C -1.240612 2.543619 4.035258
N -2.117466 3.310579 4.654100
N -1.998626 4.653020 -1.870770
C -2.676995 5.059787 -3.087535
C -3.521102 3.846094 -3.415267
O -3.403878 2.795287 -2.732893
C -1.673371 5.367534 -4.218049
C -0.601607 4.332919 -4.500565
O -0.670317 3.203213 -4.032813
N 0.490687 4.663037 -5.176033

```

|    |           |           |           |
|----|-----------|-----------|-----------|
| C  | -3.493898 | -2.413684 | -4.529815 |
| C  | -2.850834 | -1.070129 | -4.242315 |
| O  | -3.112894 | -0.073762 | -4.934205 |
| N  | -2.012573 | -1.039940 | -3.210748 |
| C  | -1.256475 | 0.145730  | -2.849058 |
| C  | 0.177963  | -0.132775 | -3.255854 |
| O  | 0.656350  | -1.227300 | -2.953743 |
| C  | -1.296668 | 0.393777  | -1.341261 |
| S  | -0.167734 | 1.712744  | -0.848403 |
| N  | 0.909908  | 0.786173  | -3.893992 |
| C  | 2.262375  | 0.496601  | -4.332839 |
| C  | 3.327430  | 1.057828  | -3.422489 |
| O  | 4.514736  | 0.960222  | -3.782587 |
| N  | 2.981292  | 1.661456  | -2.270159 |
| C  | 4.022282  | 2.166309  | -1.363316 |
| C  | 6.005631  | -3.294496 | 1.113475  |
| C  | 4.523416  | -3.349059 | 1.461474  |
| O  | 4.088517  | -4.331856 | 2.083865  |
| N  | 3.696176  | -2.382802 | 1.050209  |
| C  | 2.292954  | -2.441312 | 1.412266  |
| C  | 1.448047  | -3.388356 | 0.590344  |
| O  | 0.465367  | -3.972630 | 1.116209  |
| C  | 1.659282  | -1.087726 | 1.314863  |
| C  | 2.100998  | -0.125719 | 2.395492  |
| N  | 1.427249  | 0.994052  | 2.591227  |
| C  | 3.234512  | -0.202565 | 3.149342  |
| C  | 2.142262  | 1.657074  | 3.481259  |
| N  | 3.205439  | 0.932877  | 3.795518  |
| C  | -1.242609 | -6.667363 | 2.656781  |
| C  | -2.351663 | -5.812387 | 2.066397  |
| O  | -3.533757 | -6.017825 | 2.359713  |
| N  | -2.038601 | -4.834819 | 1.214924  |
| C  | -3.059761 | -3.927717 | 0.734565  |
| C  | -3.366578 | -4.233911 | -0.714434 |
| O  | -2.723023 | -3.657334 | -1.629293 |
| C  | -2.565655 | -2.507327 | 0.902905  |
| C  | -2.308853 | -2.173160 | 2.351849  |
| S  | -1.912017 | -0.451717 | 2.669908  |
| C  | -3.490343 | 0.330317  | 2.523247  |
| Cu | -0.106390 | 1.841380  | 1.413550  |
| H  | -3.362644 | 1.410603  | 2.731667  |
| H  | -4.216676 | -0.081960 | 3.259820  |
| H  | -3.929864 | 0.236421  | 1.504863  |
| H  | -1.436652 | -2.747053 | 2.733101  |
| H  | -3.174065 | -2.457375 | 2.994685  |
| H  | -1.646300 | -2.358501 | 0.297210  |
| H  | -3.323869 | -1.813020 | 0.473187  |
| H  | -3.961865 | -4.141717 | 1.350797  |
| H  | -4.105513 | -5.045107 | -0.953519 |
| H  | -1.065767 | -4.668925 | 0.916901  |
| H  | -0.220944 | -6.291160 | 2.437087  |
| H  | -1.341439 | -7.702997 | 2.264990  |
| H  | -1.392922 | -6.719353 | 3.755252  |
| H  | 4.014580  | -0.960690 | 3.251132  |
| H  | 3.901716  | 1.232601  | 4.487377  |
| H  | 1.938865  | 2.666194  | 3.859740  |
| H  | 1.839111  | -0.635751 | 0.308514  |
| H  | 0.552544  | -1.183964 | 1.387653  |
| H  | 2.225784  | -2.828686 | 2.451931  |
| H  | 1.685547  | -3.517592 | -0.500594 |
| H  | 4.029156  | -1.612993 | 0.461773  |
| H  | 6.227093  | -4.128972 | 0.413927  |
| H  | 6.347240  | -2.342443 | 0.650181  |
| H  | 6.587748  | -3.485008 | 2.038892  |
| H  | -1.023985 | -0.535915 | -0.796287 |
| H  | -2.328871 | 0.673485  | -1.037462 |
| H  | -1.699410 | 0.998682  | -3.402366 |



|   |           |           |           |
|---|-----------|-----------|-----------|
| H | -1.762630 | -1.916385 | -2.735687 |
| H | -3.126109 | -2.783882 | -5.512304 |
| H | -4.589571 | -2.264297 | -4.634899 |
| H | -3.290792 | -3.171836 | -3.746835 |
| H | 0.465076  | 1.698403  | -4.109515 |
| H | 2.441472  | 0.891107  | -5.356012 |
| H | 2.383911  | -0.606266 | -4.362296 |
| H | 1.989771  | 1.686623  | -1.977243 |
| H | 4.723855  | 2.826556  | -1.916192 |
| H | 3.533430  | 2.735050  | -0.545854 |
| H | 4.624934  | 1.334038  | -0.932197 |
| H | 2.181576  | 7.113750  | 1.565649  |
| H | 0.798835  | 7.492642  | 2.650070  |
| H | 3.294090  | 6.130368  | 3.306088  |
| H | 2.068698  | 4.213252  | 6.045143  |
| H | 2.502279  | 5.871353  | 6.545545  |
| H | 3.611605  | 4.970682  | 5.448492  |
| H | -4.215232 | 3.884440  | -4.297099 |
| H | 1.179570  | 3.930595  | -5.367816 |
| H | 0.627355  | 5.573429  | -5.626244 |
| H | -1.187734 | 6.340489  | -3.975309 |
| H | -2.236283 | 5.561021  | -5.164566 |
| H | -3.290847 | 5.965220  | -2.894172 |
| H | -1.780423 | 3.647611  | -1.804906 |
| H | -0.855197 | 6.792175  | 1.035227  |
| H | -0.669016 | 3.965119  | 0.220520  |
| H | -3.112607 | 3.663056  | 0.629274  |
| H | -3.199596 | 5.242971  | 1.456779  |
| H | -3.501084 | 4.809862  | 4.054367  |
| H | -2.248216 | 3.321008  | 5.670855  |
| H | -0.615029 | 1.799266  | 4.540942  |

#### Wild-Type Azurin: QM/MM

|   |           |           |           |
|---|-----------|-----------|-----------|
| C | 39.295166 | 30.687818 | 41.340846 |
| H | 39.629765 | 29.673798 | 41.050547 |
| C | 38.426742 | 31.285552 | 40.262502 |
| O | 37.186286 | 31.407371 | 40.337820 |
| N | 39.064987 | 31.730106 | 39.139735 |
| H | 40.069762 | 31.600774 | 39.023275 |
| C | 38.289248 | 32.206871 | 38.017280 |
| H | 37.608450 | 33.018624 | 38.335478 |
| H | 38.981270 | 32.617502 | 37.259524 |
| C | 37.474468 | 31.069356 | 37.381155 |
| O | 37.920823 | 29.918532 | 37.322065 |
| N | 36.258016 | 31.433129 | 36.876155 |
| H | 35.988700 | 32.425307 | 36.820127 |
| C | 35.481078 | 30.482115 | 36.106353 |
| H | 36.154662 | 29.635953 | 35.885851 |
| C | 34.242479 | 29.902914 | 36.854255 |
| H | 33.476450 | 30.696649 | 36.967748 |
| H | 33.797912 | 29.130439 | 36.193360 |
| C | 34.551655 | 29.327873 | 38.206896 |
| N | 35.532812 | 28.369328 | 38.435454 |
| C | 33.958622 | 29.628822 | 39.424150 |
| H | 33.142477 | 30.304330 | 39.686604 |
| C | 35.541145 | 28.120180 | 39.747665 |
| H | 36.209930 | 27.424266 | 40.255599 |
| N | 34.595468 | 28.857699 | 40.375410 |
| H | 34.421942 | 28.895876 | 41.401603 |
| C | 35.026358 | 31.136697 | 34.795145 |
| O | 34.765891 | 32.347412 | 34.752829 |
| N | 34.932199 | 30.276758 | 33.758184 |
| H | 35.117920 | 29.276205 | 33.927202 |
| C | 34.241486 | 30.539699 | 32.510335 |
| H | 33.629921 | 31.456340 | 32.642293 |

|   |           |           |           |
|---|-----------|-----------|-----------|
| C | 35.207111 | 30.802026 | 31.334181 |
| H | 34.628613 | 30.834902 | 30.385843 |
| H | 35.676988 | 31.797782 | 31.433438 |
| C | 36.251950 | 29.696409 | 31.217279 |
| O | 35.971567 | 28.529414 | 31.553713 |
| N | 37.451907 | 30.007346 | 30.692667 |
| H | 37.804915 | 30.948090 | 30.488100 |
| H | 38.109544 | 29.228584 | 30.497472 |
| C | 33.242194 | 29.359650 | 32.252147 |
| O | 33.247158 | 28.413789 | 33.041939 |
| C | 33.280557 | 23.122382 | 31.110555 |
| H | 32.907636 | 22.678101 | 32.053644 |
| C | 33.862263 | 24.474220 | 31.434534 |
| O | 33.594357 | 25.502195 | 30.803940 |
| N | 34.705718 | 24.498019 | 32.530474 |
| H | 34.895031 | 23.613244 | 33.011260 |
| C | 35.540231 | 25.638620 | 32.859061 |
| H | 35.156139 | 26.499041 | 32.283393 |
| C | 35.448222 | 25.922790 | 34.373617 |
| H | 34.410967 | 26.211382 | 34.619993 |
| H | 35.708958 | 25.014883 | 34.946278 |
| S | 36.572047 | 27.279949 | 34.933134 |
| C | 36.992087 | 25.305177 | 32.461302 |
| O | 37.491713 | 24.222580 | 32.815441 |
| N | 37.648252 | 26.243730 | 31.721261 |
| H | 37.145612 | 27.132068 | 31.505023 |
| C | 39.020534 | 26.051027 | 31.317043 |
| H | 39.222260 | 24.965378 | 31.312258 |
| C | 40.101084 | 26.689348 | 32.205072 |
| O | 41.289295 | 26.686753 | 31.867757 |
| N | 39.712308 | 27.177138 | 33.419314 |
| H | 38.732643 | 27.115338 | 33.735633 |
| C | 40.748880 | 27.641530 | 34.308958 |
| H | 41.376642 | 28.351095 | 33.760405 |
| C | 42.713588 | 22.224516 | 36.764702 |
| H | 43.138243 | 21.241378 | 36.488223 |
| H | 43.093509 | 22.468628 | 37.777966 |
| C | 41.205873 | 22.040964 | 36.843880 |
| O | 40.630169 | 20.970553 | 37.107507 |
| N | 40.429237 | 23.169759 | 36.645689 |
| H | 40.861831 | 24.046661 | 36.337505 |
| C | 39.030732 | 23.140183 | 37.045710 |
| H | 38.949600 | 22.797959 | 38.098405 |
| C | 38.362504 | 24.521316 | 36.925789 |
| H | 38.503497 | 24.929309 | 35.901547 |
| H | 37.268684 | 24.392445 | 37.052315 |
| C | 38.837693 | 25.511074 | 37.948991 |
| N | 38.196841 | 26.728459 | 38.160351 |
| C | 39.912352 | 25.431865 | 38.816607 |
| H | 40.630943 | 24.629328 | 38.976900 |
| C | 38.877070 | 27.372584 | 39.116961 |
| H | 38.666194 | 28.382577 | 39.469120 |
| N | 39.916446 | 26.609559 | 39.542589 |
| H | 40.626784 | 26.865630 | 40.250036 |
| C | 38.209823 | 22.120158 | 36.240773 |
| O | 37.245614 | 21.604217 | 36.837406 |
| C | 35.503890 | 18.870471 | 38.296228 |
| H | 35.104962 | 17.873592 | 38.573665 |
| C | 34.322768 | 19.665270 | 37.806917 |
| O | 33.156640 | 19.525788 | 38.211929 |
| N | 34.625552 | 20.636397 | 36.869121 |
| H | 35.612415 | 20.781726 | 36.613238 |
| C | 33.686578 | 21.644735 | 36.426453 |
| H | 32.757920 | 21.474579 | 37.009786 |
| C | 34.208781 | 23.074015 | 36.627107 |
| H | 35.128167 | 23.211908 | 36.028080 |
| H | 33.458444 | 23.776342 | 36.221804 |

|    |           |           |           |
|----|-----------|-----------|-----------|
| C  | 34.489617 | 23.385948 | 38.099922 |
| H  | 33.657852 | 23.064879 | 38.757458 |
| H  | 35.400469 | 22.857929 | 38.438172 |
| S  | 34.806630 | 25.169765 | 38.440305 |
| C  | 33.149826 | 25.866306 | 38.073187 |
| H  | 33.123050 | 26.888961 | 38.488067 |
| H  | 32.951152 | 25.913934 | 36.988903 |
| H  | 32.362195 | 25.259756 | 38.552788 |
| C  | 33.390962 | 21.280883 | 34.940169 |
| O  | 34.041809 | 21.805421 | 34.033501 |
| H  | 40.190465 | 31.306637 | 41.507485 |
| H  | 38.740781 | 30.631268 | 42.281582 |
| H  | 32.516904 | 29.475388 | 31.542289 |
| H  | 32.459833 | 23.204253 | 30.381188 |
| H  | 34.014760 | 22.407800 | 30.728662 |
| H  | 39.204376 | 26.404569 | 30.298842 |
| H  | 40.344818 | 28.158945 | 35.183337 |
| H  | 41.383370 | 26.783516 | 34.576143 |
| H  | 43.030283 | 22.989221 | 36.038619 |
| H  | 38.432815 | 21.920235 | 35.264226 |
| H  | 36.367733 | 18.763516 | 37.621986 |
| H  | 35.826941 | 19.283254 | 39.255797 |
| H  | 32.644524 | 20.596007 | 34.809350 |
| Cu | 36.651041 | 27.392147 | 37.111032 |

### C112D Azurin: X-ray Diffraction

|   |           |           |           |
|---|-----------|-----------|-----------|
| C | 4.558995  | -6.459125 | -2.391922 |
| C | 4.146389  | -6.098535 | -0.944458 |
| O | 3.119571  | -6.543085 | -0.461577 |
| N | 4.982515  | -5.299096 | -0.274945 |
| C | 4.736888  | -4.878440 | 1.117528  |
| C | 3.526817  | -3.967579 | 1.151749  |
| O | 3.335474  | -3.117733 | 0.243612  |
| N | 2.664130  | -4.127618 | 2.165852  |
| C | 1.525072  | -3.160808 | 2.260105  |
| C | 1.490440  | -2.625153 | 3.673624  |
| O | 1.900777  | -3.324001 | 4.604840  |
| C | 0.165062  | -3.810712 | 2.031888  |
| C | -0.005268 | -4.492468 | 0.705291  |
| N | 0.384323  | -3.940272 | -0.517300 |
| C | -0.621249 | -5.663248 | 0.415361  |
| C | -0.019894 | -4.744379 | -1.496945 |
| N | -0.637643 | -5.781947 | -0.955748 |
| N | 1.033378  | -1.365352 | 3.841955  |
| C | 0.822724  | -0.823639 | 5.178532  |
| C | -0.460375 | -0.036660 | 5.080657  |
| O | -0.951979 | 0.227536  | 3.952784  |
| C | 1.997790  | 0.048001  | 5.667014  |
| C | 2.431387  | 1.145025  | 4.629927  |
| O | 1.793064  | 1.327960  | 3.585288  |
| N | 3.491416  | 1.877816  | 4.948310  |
| C | -3.320727 | 4.633113  | 1.895931  |
| C | -2.078539 | 3.803851  | 2.286778  |
| O | -1.682198 | 3.749802  | 3.428610  |
| N | -1.501772 | 3.158839  | 1.299995  |
| C | -0.339675 | 2.364856  | 1.389899  |
| C | 0.861072  | 3.174547  | 0.774314  |
| O | 0.703699  | 3.803556  | -0.303043 |
| C | -0.683807 | 1.136601  | 0.571834  |
| C | 0.445249  | 0.122809  | 0.457539  |
| O | 1.591179  | 0.475039  | 0.322536  |
| O | 0.141360  | -1.068232 | 0.472498  |
| N | 2.034261  | 3.174042  | 1.414968  |
| C | 3.141034  | 4.024627  | 0.902449  |
| C | 4.226893  | 3.164424  | 0.164313  |

|    |           |           |           |
|----|-----------|-----------|-----------|
| O  | 5.290748  | 3.657844  | -0.179533 |
| N  | 3.975944  | 1.877605  | -0.050835 |
| C  | 4.952802  | 1.059382  | -0.778900 |
| C  | 3.325907  | 2.714876  | -6.716852 |
| C  | 1.949104  | 2.257249  | -6.184881 |
| O  | 0.922890  | 2.331828  | -6.890508 |
| N  | 1.914513  | 1.725082  | -4.958375 |
| C  | 0.679711  | 1.084515  | -4.476619 |
| C  | -0.468301 | 2.051177  | -4.227363 |
| O  | -1.657676 | 1.665741  | -4.370183 |
| C  | 0.972169  | 0.199318  | -3.189545 |
| C  | 1.790180  | -0.992305 | -3.510918 |
| N  | 1.914520  | -2.083078 | -2.684989 |
| C  | 2.486876  | -1.297177 | -4.634413 |
| C  | 2.682433  | -2.994471 | -3.254081 |
| N  | 3.037042  | -2.543307 | -4.446758 |
| C  | -5.027831 | 1.739569  | -6.118317 |
| C  | -5.370377 | 1.556128  | -4.633390 |
| O  | -6.558253 | 1.372677  | -4.268214 |
| N  | -4.330136 | 1.565441  | -3.812687 |
| C  | -4.450693 | 1.176114  | -2.426020 |
| C  | -4.587555 | 2.443295  | -1.575777 |
| O  | -3.587721 | 2.901954  | -0.964603 |
| C  | -3.268505 | 0.315857  | -2.045185 |
| C  | -3.356593 | -1.031480 | -2.752438 |
| S  | -1.993337 | -2.015905 | -2.178774 |
| C  | -2.614814 | -2.600479 | -0.578145 |
| Cu | 1.199082  | -2.073956 | -0.773769 |
| H  | -1.788486 | -3.142410 | -0.090164 |
| H  | -3.482095 | -3.281622 | -0.721164 |
| H  | -2.906722 | -1.755683 | 0.081919  |
| H  | -3.234992 | -0.915741 | -3.850623 |
| H  | -4.324309 | -1.549760 | -2.570747 |
| H  | -2.319052 | 0.824429  | -2.296263 |
| H  | -3.270371 | 0.168796  | -0.943672 |
| H  | -5.417378 | 0.623685  | -2.350877 |
| H  | -5.567990 | 2.989849  | -1.592782 |
| H  | -3.388659 | 1.831896  | -4.139059 |
| H  | -3.955580 | 1.960490  | -6.305767 |
| H  | -5.654289 | 2.552880  | -6.541734 |
| H  | -5.304084 | 0.805688  | -6.654599 |
| H  | 2.992069  | -3.945692 | -2.804968 |
| H  | 3.619190  | -3.033157 | -5.132361 |
| H  | 2.653828  | -0.739959 | -5.562199 |
| H  | 1.444208  | 0.821779  | -2.392451 |
| H  | -0.004966 | -0.145911 | -2.778507 |
| H  | 0.304069  | 0.408103  | -5.275322 |
| H  | -0.226477 | 3.096227  | -3.895759 |
| H  | 2.733962  | 1.750977  | -4.344981 |
| H  | 4.136263  | 2.696209  | -5.956672 |
| H  | 3.226458  | 3.743281  | -7.121936 |
| H  | 3.606180  | 2.054729  | -7.566197 |
| H  | -1.586101 | 0.654657  | 0.997886  |
| H  | -0.929275 | 1.456796  | -0.466739 |
| H  | -0.149749 | 2.117079  | 2.452990  |
| H  | -1.879133 | 3.295639  | 0.353834  |
| H  | -3.066710 | 5.712987  | 1.975094  |
| H  | -4.125879 | 4.428502  | 2.632256  |
| H  | -3.674206 | 4.406742  | 0.869005  |
| H  | 2.136450  | 2.592446  | 2.268740  |
| H  | 3.641306  | 4.569254  | 1.729925  |
| H  | 2.702221  | 4.741197  | 0.180595  |
| H  | 3.053931  | 1.464599  | 0.176097  |
| H  | 5.967194  | 1.206862  | -0.350687 |
| H  | 4.654063  | -0.005364 | -0.690766 |
| H  | 5.008158  | 1.345030  | -1.855654 |
| H  | 5.632052  | -4.324448 | 1.469755  |

|   |           |           |           |
|---|-----------|-----------|-----------|
| H | 4.590516  | -5.770693 | 1.764052  |
| H | 5.808473  | -4.919511 | -0.740882 |
| H | 4.940817  | -7.503895 | -2.404453 |
| H | 3.650748  | -6.442295 | -3.029401 |
| H | 5.342061  | -5.799999 | -2.827532 |
| H | 2.851864  | -4.694363 | 3.001315  |
| H | 1.718811  | -2.360097 | 1.527007  |
| H | -0.601086 | -3.008450 | 2.128446  |
| H | -0.031283 | -4.550731 | 2.837600  |
| H | -1.071191 | -6.427515 | 1.059942  |
| H | -1.020783 | -6.583991 | -1.464848 |
| H | 0.107199  | -4.573390 | -2.571754 |
| H | 0.635274  | -0.812459 | 3.073193  |
| H | -0.931725 | 0.353424  | 6.022879  |
| H | 2.861829  | -0.621004 | 5.878607  |
| H | 1.737824  | 0.543703  | 6.631613  |
| H | 4.019140  | 1.739786  | 5.814764  |
| H | 3.798105  | 2.624439  | 4.317033  |
| H | 0.712479  | -1.671100 | 5.891957  |

#### C112D: QM/MM Bidentate

|   |           |           |           |
|---|-----------|-----------|-----------|
| C | 38.684659 | 20.256911 | 20.437416 |
| H | 38.477038 | 21.120986 | 19.775239 |
| C | 38.270020 | 20.624003 | 21.829176 |
| O | 37.276895 | 20.174859 | 22.437774 |
| N | 39.085024 | 21.531556 | 22.443644 |
| H | 39.882401 | 21.935954 | 21.952148 |
| C | 38.817228 | 21.958536 | 23.793870 |
| H | 38.670215 | 21.085844 | 24.451626 |
| H | 39.689503 | 22.530142 | 24.155245 |
| C | 37.585381 | 22.850057 | 23.847940 |
| O | 37.428275 | 23.741305 | 23.003034 |
| N | 36.727715 | 22.610050 | 24.874159 |
| H | 36.945326 | 21.884384 | 25.567996 |
| C | 35.593145 | 23.481216 | 25.094533 |
| H | 35.717388 | 24.317779 | 24.388678 |
| C | 34.233643 | 22.810352 | 24.799425 |
| H | 34.034933 | 22.012664 | 25.542692 |
| H | 33.452333 | 23.582303 | 24.949988 |
| C | 34.113325 | 22.249585 | 23.408077 |
| N | 34.540411 | 22.908261 | 22.261851 |
| C | 33.477996 | 21.086696 | 23.012055 |
| H | 33.032160 | 20.285116 | 23.594036 |
| C | 34.161080 | 22.173376 | 21.214786 |
| H | 34.326371 | 22.420613 | 20.166100 |
| N | 33.520233 | 21.054989 | 21.630894 |
| H | 32.937157 | 20.447033 | 21.033005 |
| C | 35.646481 | 24.036778 | 26.521919 |
| O | 36.032043 | 23.323887 | 27.455976 |
| N | 35.264248 | 25.331577 | 26.631576 |
| H | 34.764032 | 25.770908 | 25.846303 |
| C | 35.040860 | 25.997451 | 27.898165 |
| H | 34.971358 | 25.205538 | 28.671150 |
| C | 36.185342 | 26.939546 | 28.326807 |
| H | 35.825178 | 27.521956 | 29.202669 |
| H | 37.063523 | 26.349202 | 28.647595 |
| C | 36.610909 | 27.952151 | 27.262976 |
| O | 35.818400 | 28.279783 | 26.358134 |
| N | 37.846197 | 28.473969 | 27.377510 |
| H | 38.515376 | 28.218967 | 28.109276 |
| H | 38.143318 | 29.214462 | 26.714680 |
| C | 33.650263 | 26.699787 | 27.859435 |
| O | 33.030888 | 26.668309 | 26.794449 |
| C | 30.834551 | 31.368528 | 24.677546 |
| H | 30.211848 | 30.768479 | 23.993255 |

|   |           |           |           |
|---|-----------|-----------|-----------|
| C | 32.009106 | 30.524852 | 25.077846 |
| O | 32.282865 | 30.196485 | 26.237691 |
| N | 32.749959 | 30.095809 | 24.003045 |
| H | 32.380637 | 30.283327 | 23.069174 |
| C | 33.846100 | 29.162052 | 24.084769 |
| H | 34.039757 | 28.974766 | 25.154552 |
| C | 33.403309 | 27.870984 | 23.377765 |
| H | 32.511053 | 27.484009 | 23.887886 |
| H | 33.103383 | 28.149496 | 22.346288 |
| C | 34.365632 | 26.737813 | 23.210019 |
| O | 35.503575 | 26.865887 | 22.641227 |
| O | 33.964291 | 25.549834 | 23.495877 |
| C | 35.036803 | 29.842716 | 23.402336 |
| O | 34.934878 | 30.264048 | 22.235279 |
| N | 36.127440 | 30.004834 | 24.190639 |
| H | 36.145234 | 29.506455 | 25.105776 |
| C | 37.274567 | 30.736162 | 23.728337 |
| H | 36.919836 | 31.436565 | 22.949616 |
| C | 38.391505 | 29.904686 | 23.049876 |
| O | 39.456949 | 30.419657 | 22.725955 |
| N | 38.080930 | 28.591749 | 22.753237 |
| H | 37.128442 | 28.231141 | 22.880143 |
| C | 39.024958 | 27.813843 | 21.990791 |
| H | 40.020740 | 27.974345 | 22.421933 |
| C | 37.421754 | 29.428305 | 16.122679 |
| H | 37.308578 | 30.324013 | 15.481558 |
| H | 37.736173 | 28.622043 | 15.438087 |
| C | 36.055180 | 29.084445 | 16.663378 |
| O | 34.981996 | 29.280909 | 16.058068 |
| N | 36.018645 | 28.479908 | 17.901482 |
| H | 36.890588 | 28.333946 | 18.421060 |
| C | 34.807294 | 27.800478 | 18.330681 |
| H | 34.465091 | 27.131082 | 17.524183 |
| C | 35.047156 | 26.963062 | 19.592685 |
| H | 35.498793 | 27.577287 | 20.396884 |
| H | 34.062532 | 26.627797 | 19.980927 |
| C | 35.865173 | 25.727757 | 19.348203 |
| N | 35.995358 | 24.740901 | 20.320046 |
| C | 36.528761 | 25.296514 | 18.211700 |
| H | 36.656316 | 25.793081 | 17.248183 |
| C | 36.704858 | 23.742337 | 19.796743 |
| H | 37.014998 | 22.836465 | 20.318444 |
| N | 37.033104 | 24.038299 | 18.513385 |
| H | 37.528152 | 23.402868 | 17.888164 |
| C | 33.639510 | 28.777921 | 18.559324 |
| O | 32.498818 | 28.330847 | 18.356965 |
| C | 29.105960 | 28.464188 | 16.702586 |
| H | 28.223666 | 28.941533 | 16.235457 |
| C | 28.748550 | 28.374631 | 18.173941 |
| O | 27.593262 | 28.444236 | 18.636906 |
| N | 29.801824 | 28.174194 | 19.036247 |
| H | 30.766229 | 28.343707 | 18.720924 |
| C | 29.636515 | 27.830923 | 20.440488 |
| H | 28.661691 | 27.308402 | 20.536294 |
| C | 30.796039 | 26.957535 | 20.923147 |
| H | 31.735984 | 27.537510 | 20.885521 |
| H | 30.619692 | 26.696201 | 21.983557 |
| C | 30.898040 | 25.706952 | 20.059901 |
| H | 29.910905 | 25.224758 | 20.012620 |
| H | 31.194342 | 25.954943 | 19.025356 |
| S | 32.102814 | 24.456828 | 20.622700 |
| C | 31.354311 | 23.968345 | 22.222780 |
| H | 31.526686 | 22.887497 | 22.363904 |
| H | 31.807379 | 24.537838 | 23.051618 |
| H | 30.266710 | 24.146925 | 22.186460 |
| C | 29.519384 | 29.170318 | 21.209953 |
| O | 30.497425 | 29.638480 | 21.797982 |

|    |           |           |           |
|----|-----------|-----------|-----------|
| H  | 39.771481 | 20.108895 | 20.341629 |
| H  | 38.134403 | 19.388499 | 20.065120 |
| H  | 33.242819 | 27.030354 | 28.735823 |
| H  | 30.285946 | 31.707235 | 25.570058 |
| H  | 31.103497 | 32.278893 | 24.134934 |
| H  | 37.715382 | 31.330912 | 24.532998 |
| H  | 38.804886 | 26.743027 | 22.011885 |
| H  | 39.057376 | 28.199703 | 20.961124 |
| H  | 38.235536 | 29.595624 | 16.845196 |
| H  | 33.862983 | 29.725754 | 18.867562 |
| H  | 29.994396 | 29.076363 | 16.483062 |
| H  | 29.181190 | 27.477369 | 16.237772 |
| H  | 28.614090 | 29.638309 | 21.140905 |
| Cu | 35.236177 | 24.778769 | 22.121062 |

C112D: QM/MM Monodentate

|   |           |           |           |
|---|-----------|-----------|-----------|
| C | 38.684659 | 20.256911 | 20.437416 |
| H | 38.477402 | 21.120869 | 19.775434 |
| C | 38.272257 | 20.621249 | 21.830087 |
| O | 37.278481 | 20.172916 | 22.438168 |
| N | 39.092913 | 21.522328 | 22.444638 |
| H | 39.885396 | 21.930820 | 21.948793 |
| C | 38.821146 | 21.960131 | 23.789954 |
| H | 38.670198 | 21.093081 | 24.454343 |
| H | 39.692489 | 22.533611 | 24.150289 |
| C | 37.589701 | 22.853164 | 23.827490 |
| O | 37.433561 | 23.729112 | 22.967267 |
| N | 36.733794 | 22.630002 | 24.858580 |
| H | 36.949776 | 21.913771 | 25.562203 |
| C | 35.605028 | 23.509988 | 25.072371 |
| H | 35.728936 | 24.343295 | 24.363187 |
| C | 34.240326 | 22.842610 | 24.785995 |
| H | 34.027461 | 22.075646 | 25.558011 |
| H | 33.467524 | 23.629404 | 24.901976 |
| C | 34.113296 | 22.222481 | 23.420424 |
| N | 34.534866 | 22.817908 | 22.241039 |
| C | 33.461951 | 21.050033 | 23.084512 |
| H | 33.022702 | 20.282203 | 23.712353 |
| C | 34.141154 | 22.040398 | 21.233209 |
| H | 34.301301 | 22.237939 | 20.172449 |
| N | 33.494490 | 20.948531 | 21.706414 |
| H | 32.886551 | 20.338565 | 21.134021 |
| C | 35.654782 | 24.053127 | 26.505290 |
| O | 36.017123 | 23.325174 | 27.438008 |
| N | 35.287813 | 25.351109 | 26.626623 |
| H | 34.848336 | 25.819422 | 25.825619 |
| C | 35.046347 | 26.006798 | 27.895531 |
| H | 34.973554 | 25.205224 | 28.658512 |
| C | 36.185222 | 26.946363 | 28.342417 |
| H | 35.817492 | 27.525698 | 29.216939 |
| H | 37.061357 | 26.354603 | 28.665937 |
| C | 36.614539 | 27.958434 | 27.280211 |
| O | 35.823491 | 28.275037 | 26.370570 |
| N | 37.845746 | 28.487557 | 27.397557 |
| H | 38.514417 | 28.235140 | 28.130530 |
| H | 38.144884 | 29.219388 | 26.725820 |
| C | 33.650263 | 26.699787 | 27.859435 |
| O | 33.019530 | 26.651657 | 26.801436 |
| C | 30.834551 | 31.368528 | 24.677546 |
| H | 30.211845 | 30.767680 | 23.993324 |
| C | 31.997764 | 30.522317 | 25.087034 |
| O | 32.268794 | 30.226508 | 26.258277 |
| N | 32.725021 | 30.043833 | 24.032461 |
| H | 32.410042 | 30.254871 | 23.084274 |
| C | 33.862688 | 29.172850 | 24.167760 |

|   |           |           |           |
|---|-----------|-----------|-----------|
| H | 34.086252 | 29.109800 | 25.245124 |
| C | 33.474318 | 27.775489 | 23.655863 |
| H | 32.867445 | 27.275613 | 24.427151 |
| H | 32.828820 | 27.885997 | 22.760402 |
| C | 34.583454 | 26.848736 | 23.237650 |
| O | 35.677925 | 27.265276 | 22.798354 |
| O | 34.263395 | 25.585639 | 23.270002 |
| C | 35.023952 | 29.856799 | 23.429475 |
| O | 34.884965 | 30.312473 | 22.279635 |
| N | 36.132316 | 30.009472 | 24.195726 |
| H | 36.168838 | 29.493167 | 25.097308 |
| C | 37.274567 | 30.736162 | 23.728337 |
| H | 36.916681 | 31.438450 | 22.952486 |
| C | 38.405064 | 29.918936 | 23.043789 |
| O | 39.458444 | 30.454716 | 22.708351 |
| N | 38.103259 | 28.606641 | 22.762309 |
| H | 37.149134 | 28.248391 | 22.911465 |
| C | 39.024958 | 27.813843 | 21.990791 |
| H | 40.028080 | 27.959182 | 22.411149 |
| C | 37.421754 | 29.428305 | 16.122679 |
| H | 37.311277 | 30.322219 | 15.478547 |
| H | 37.735098 | 28.619531 | 15.440653 |
| C | 36.055768 | 29.088829 | 16.664688 |
| O | 34.982223 | 29.281004 | 16.057792 |
| N | 36.018483 | 28.488738 | 17.904786 |
| H | 36.887739 | 28.351183 | 18.431719 |
| C | 34.808494 | 27.801515 | 18.324821 |
| H | 34.467274 | 27.151664 | 17.502195 |
| C | 35.058290 | 26.920989 | 19.558215 |
| H | 35.509675 | 27.506135 | 20.386497 |
| H | 34.077985 | 26.561580 | 19.935343 |
| C | 35.889541 | 25.705890 | 19.255566 |
| N | 36.023333 | 24.674420 | 20.180634 |
| C | 36.578129 | 25.340574 | 18.111634 |
| H | 36.714131 | 25.884640 | 17.175718 |
| C | 36.758352 | 23.714605 | 19.623507 |
| H | 37.075208 | 22.791168 | 20.108591 |
| N | 37.100639 | 24.077452 | 18.361647 |
| H | 37.614626 | 23.480240 | 17.714648 |
| C | 33.639510 | 28.777921 | 18.559324 |
| O | 32.498121 | 28.328879 | 18.359658 |
| C | 29.105960 | 28.464188 | 16.702586 |
| H | 28.222588 | 28.940983 | 16.237221 |
| C | 28.754982 | 28.379789 | 18.174564 |
| O | 27.605430 | 28.468796 | 18.648161 |
| N | 29.809586 | 28.165320 | 19.035875 |
| H | 30.776575 | 28.334710 | 18.722216 |
| C | 29.641258 | 27.827465 | 20.437261 |
| H | 28.663753 | 27.310840 | 20.536469 |
| C | 30.797321 | 26.950207 | 20.924543 |
| H | 31.753292 | 27.496513 | 20.826551 |
| H | 30.648428 | 26.735314 | 21.999209 |
| C | 30.816829 | 25.663480 | 20.106613 |
| H | 29.815912 | 25.209382 | 20.159298 |
| H | 31.037921 | 25.868455 | 19.044089 |
| S | 32.028457 | 24.401251 | 20.617088 |
| C | 31.388491 | 23.986796 | 22.279130 |
| H | 31.641124 | 22.932737 | 22.483806 |
| H | 31.846543 | 24.637372 | 23.043831 |
| H | 30.290686 | 24.094111 | 22.284383 |
| C | 29.519384 | 29.170319 | 21.209953 |
| O | 30.494914 | 29.640346 | 21.793209 |
| H | 39.771481 | 20.108896 | 20.341629 |
| H | 38.134403 | 19.388499 | 20.065120 |
| H | 33.242819 | 27.030354 | 28.735823 |
| H | 30.285946 | 31.707235 | 25.570058 |
| H | 31.103497 | 32.278893 | 24.134934 |



|    |           |           |           |
|----|-----------|-----------|-----------|
| H  | 37.715382 | 31.330912 | 24.532998 |
| H  | 38.804886 | 26.743027 | 22.011885 |
| H  | 39.057376 | 28.199704 | 20.961124 |
| H  | 38.235536 | 29.595624 | 16.845196 |
| H  | 33.862983 | 29.725754 | 18.867562 |
| H  | 29.994396 | 29.076363 | 16.483062 |
| H  | 29.181190 | 27.477369 | 16.237772 |
| H  | 28.614090 | 29.638309 | 21.140905 |
| Cu | 35.250059 | 24.636298 | 21.933422 |

C112D: SORCI (QM/MM Monodentate)

|    |           |           |           |
|----|-----------|-----------|-----------|
| C  | 0.655978  | -0.622665 | 3.372052  |
| O  | 0.017874  | 0.077424  | 2.574832  |
| N  | 1.047886  | -1.899794 | 3.123738  |
| H  | 1.531357  | -2.420183 | 3.856805  |
| C  | 0.638886  | -2.563504 | 1.904331  |
| C  | 1.801756  | -2.817210 | 0.920075  |
| H  | 2.515436  | -3.545692 | 1.351408  |
| H  | 1.369777  | -3.285024 | 0.013668  |
| C  | 2.560120  | -1.576996 | 0.530800  |
| N  | 1.961392  | -0.366035 | 0.206471  |
| C  | 3.919635  | -1.444634 | 0.313999  |
| H  | 4.737521  | -2.155127 | 0.448733  |
| C  | 2.926423  | 0.458557  | -0.204719 |
| H  | 2.785747  | 1.478861  | -0.563232 |
| N  | 4.130837  | -0.158275 | -0.145432 |
| H  | 5.026696  | 0.249914  | -0.412871 |
| C  | -2.327957 | -1.919859 | -2.314229 |
| C  | -1.622161 | -1.368157 | -1.116009 |
| O  | -2.081076 | -0.399109 | -0.419448 |
| O  | -0.424262 | -1.769791 | -0.875555 |
| C  | -0.699845 | 2.787869  | -0.872698 |
| N  | 0.017787  | 1.962071  | -0.013403 |
| C  | -0.388121 | 4.100722  | -0.560913 |
| H  | -0.726708 | 5.047359  | -0.985357 |
| C  | 0.745004  | 2.738706  | 0.788079  |
| H  | 1.362504  | 2.391028  | 1.618016  |
| N  | 0.535352  | 4.042598  | 0.474607  |
| H  | 0.934787  | 4.845383  | 0.961647  |
| C  | 1.063294  | 0.176781  | -4.778194 |
| S  | 1.681634  | 0.154596  | -3.061169 |
| C  | 2.178700  | -1.602834 | -2.907952 |
| H  | 2.851677  | -1.693033 | -2.041101 |
| H  | 1.297603  | -2.248526 | -2.745793 |
| H  | 2.729524  | -1.918833 | -3.813357 |
| Cu | 0.007239  | 0.007268  | -0.004794 |
| H  | 0.717219  | 1.205979  | -4.981580 |
| H  | 0.214889  | -0.518778 | -4.916159 |
| H  | 1.868394  | -0.073855 | -5.493874 |
| H  | 0.959130  | -0.247269 | 4.379186  |
| H  | 0.169891  | -3.535966 | 2.153490  |
| H  | -0.144677 | -1.949842 | 1.438132  |
| H  | -1.386571 | 2.386716  | -1.618968 |
| H  | -3.420738 | -1.777112 | -2.247022 |
| H  | -2.090857 | -2.988496 | -2.459221 |
| H  | -1.960347 | -1.366393 | -3.200075 |

C112D/M121L: X-ray Diffraction

|   |          |          |          |
|---|----------|----------|----------|
| C | 4.021251 | 3.515018 | 6.183028 |
| C | 3.675357 | 4.113006 | 4.792927 |
| O | 2.581892 | 4.727589 | 4.583839 |
| N | 4.568547 | 3.919211 | 3.842002 |
| C | 4.366583 | 4.414127 | 2.472031 |
| C | 3.186012 | 3.651959 | 1.911191 |
| O | 3.019049 | 2.459817 | 2.260045 |

|    |           |           |           |
|----|-----------|-----------|-----------|
| N  | 2.330354  | 4.336797  | 1.120263  |
| C  | 1.306173  | 3.671723  | 0.298490  |
| C  | 1.416323  | 4.180558  | -1.152056 |
| O  | 1.612051  | 5.318591  | -1.341104 |
| C  | -0.119247 | 3.968070  | 0.704766  |
| C  | -0.417297 | 3.760302  | 2.174244  |
| N  | 0.040269  | 2.679664  | 2.910200  |
| C  | -1.123119 | 4.517079  | 3.025761  |
| C  | -0.410346 | 2.774100  | 4.148657  |
| N  | -1.114001 | 3.897337  | 4.241398  |
| N  | 1.258267  | 3.305219  | -2.132799 |
| C  | 0.931216  | 3.701166  | -3.467997 |
| C  | -0.449503 | 3.076989  | -3.875221 |
| O  | -1.047340 | 2.301872  | -3.084426 |
| C  | 2.096380  | 3.350276  | -4.448654 |
| C  | 2.525677  | 1.886055  | -4.379969 |
| O  | 1.756720  | 1.031103  | -3.931515 |
| N  | 3.719286  | 1.563894  | -4.935571 |
| C  | -3.260176 | -2.404561 | -4.338301 |
| C  | -2.060171 | -1.516228 | -4.063159 |
| O  | -1.568722 | -0.796910 | -4.923067 |
| N  | -1.552837 | -1.644172 | -2.855557 |
| C  | -0.355173 | -0.963954 | -2.390544 |
| C  | 0.819511  | -1.967397 | -2.466584 |
| O  | 0.729367  | -3.121661 | -1.971404 |
| C  | -0.678864 | -0.458683 | -0.966669 |
| C  | 0.523422  | 0.146376  | -0.241695 |
| O  | 1.639219  | 0.379229  | -0.765063 |
| O  | 0.307979  | 0.429756  | 0.927191  |
| N  | 1.963500  | -1.576499 | -3.083819 |
| C  | 3.109158  | -2.533951 | -3.126870 |
| C  | 4.142728  | -2.321073 | -1.988359 |
| O  | 5.178432  | -3.008509 | -1.981392 |
| N  | 3.912867  | -1.392544 | -1.054101 |
| C  | 4.824439  | -1.250601 | 0.060204  |
| C  | 3.379836  | -6.400024 | 3.393154  |
| C  | 2.026235  | -5.664417 | 3.323792  |
| O  | 1.115220  | -6.107414 | 3.944307  |
| N  | 1.904671  | -4.531928 | 2.602316  |
| C  | 0.694859  | -3.698496 | 2.721205  |
| C  | -0.481290 | -4.225518 | 1.918313  |
| O  | -1.656735 | -4.035340 | 2.325414  |
| C  | 1.049795  | -2.265490 | 2.468548  |
| C  | 1.827540  | -1.654501 | 3.599959  |
| N  | 1.922881  | -0.294643 | 3.769912  |
| C  | 2.486892  | -2.214419 | 4.659501  |
| C  | 2.606506  | -0.026605 | 4.883989  |
| N  | 2.971285  | -1.177094 | 5.438779  |
| C  | -4.784855 | -4.891762 | 3.627162  |
| C  | -5.230119 | -3.731007 | 2.690270  |
| O  | -6.374004 | -3.332553 | 2.727984  |
| N  | -4.318871 | -3.160928 | 1.934833  |
| C  | -4.601368 | -1.961355 | 1.184182  |
| C  | -4.730707 | -2.494444 | -0.226315 |
| O  | -3.728186 | -2.511994 | -0.986720 |
| C  | -3.428159 | -0.973936 | 1.337349  |
| C  | -3.438687 | -0.276759 | 2.699759  |
| C  | -2.236815 | -0.500731 | 3.475229  |
| C  | -3.757982 | 1.207414  | 2.635233  |
| Cu | 1.119119  | 1.108443  | 2.532688  |
| H  | -1.343038 | -0.031180 | 2.996677  |
| H  | -2.010405 | -1.585778 | 3.594134  |
| H  | -2.314195 | -0.076059 | 4.503972  |
| H  | -2.948184 | 1.769833  | 2.112759  |
| H  | -3.865055 | 1.636994  | 3.656586  |
| H  | -4.708789 | 1.410323  | 2.091889  |
| H  | -4.279398 | -0.734210 | 3.280172  |

|   |           |           |           |
|---|-----------|-----------|-----------|
| H | -2.481636 | -1.529494 | 1.176253  |
| H | -3.477543 | -0.230755 | 0.510452  |
| H | -5.570758 | -1.562399 | 1.551688  |
| H | -3.364489 | -3.551792 | 1.883260  |
| H | -5.696217 | -2.983760 | -0.526738 |
| H | -3.748861 | -5.246406 | 3.444056  |
| H | -5.500477 | -5.731503 | 3.509336  |
| H | -4.866670 | -4.526343 | 4.673307  |
| H | 2.860938  | 0.971102  | 5.260514  |
| H | 3.496705  | -1.296829 | 6.309490  |
| H | 2.660931  | -3.257905 | 4.943380  |
| H | 1.604933  | -2.157786 | 1.505783  |
| H | 0.128232  | -1.660940 | 2.331771  |
| H | -0.275458 | -4.779670 | 0.963011  |
| H | 0.341856  | -3.805178 | 3.771965  |
| H | 2.676823  | -4.192340 | 2.021518  |
| H | 4.194954  | -5.966962 | 2.772319  |
| H | 3.212543  | -7.453504 | 3.086784  |
| H | 3.700266  | -6.414605 | 4.456633  |
| H | -0.229918 | 2.075229  | 4.973459  |
| H | -1.561119 | 4.262103  | 5.087271  |
| H | -1.646010 | 5.469696  | 2.877856  |
| H | -0.787410 | 3.324847  | 0.087507  |
| H | -0.369492 | 5.022037  | 0.454259  |
| H | 1.513704  | 2.582733  | 0.359424  |
| H | 1.148665  | 2.300167  | -1.916431 |
| H | 0.822066  | 4.809470  | -3.479478 |
| H | -0.863968 | 3.331214  | -4.888186 |
| H | 2.951570  | 4.027170  | -4.228582 |
| H | 1.792518  | 3.565007  | -5.501472 |
| H | 4.357615  | 2.269066  | -5.312158 |
| H | 4.000791  | 0.580537  | -4.987524 |
| H | 5.280306  | 4.193431  | 1.881300  |
| H | 4.192337  | 5.511814  | 2.475481  |
| H | 5.421983  | 3.391564  | 4.035577  |
| H | 4.324340  | 4.336523  | 6.869156  |
| H | 3.101464  | 3.063589  | 6.608764  |
| H | 4.839873  | 2.763053  | 6.156142  |
| H | -1.483993 | 0.302422  | -1.034282 |
| H | -1.063575 | -1.295567 | -0.348485 |
| H | -0.167035 | -0.115227 | -3.076952 |
| H | -2.011371 | -2.279563 | -2.190609 |
| H | -2.922232 | -3.292466 | -4.917901 |
| H | -3.985211 | -1.854535 | -4.973344 |
| H | -3.754352 | -2.745156 | -3.404573 |
| H | 2.030509  | -0.617682 | -3.480927 |
| H | 5.850865  | -0.993771 | -0.286472 |
| H | 4.448234  | -0.443753 | 0.722033  |
| H | 4.910357  | -2.199338 | 0.638403  |
| H | 3.052485  | -0.805834 | -1.081380 |
| H | 3.645971  | -2.447599 | -4.094420 |
| H | 2.700277  | -3.558148 | -3.026480 |
| H | 2.532760  | 5.310137  | 0.855527  |

#### C112D/M121L: QM/MM Bidentate

|   |           |           |           |
|---|-----------|-----------|-----------|
| C | 38.029545 | 30.235725 | 44.457716 |
| H | 37.692668 | 29.184156 | 44.494452 |
| C | 37.683172 | 30.830806 | 43.107920 |
| O | 36.665030 | 31.498139 | 42.829094 |
| N | 38.602583 | 30.601039 | 42.118169 |
| H | 39.392407 | 29.977351 | 42.277457 |
| C | 38.336595 | 31.053612 | 40.774079 |
| H | 38.106994 | 32.133979 | 40.777865 |
| H | 39.240776 | 30.897190 | 40.159485 |
| C | 37.188125 | 30.277031 | 40.129899 |

|   |           |           |           |
|---|-----------|-----------|-----------|
| O | 37.077193 | 29.051050 | 40.322078 |
| N | 36.379502 | 30.990449 | 39.314683 |
| H | 36.487231 | 32.017060 | 39.232841 |
| C | 35.345394 | 30.344051 | 38.525217 |
| H | 35.589538 | 29.267717 | 38.510427 |
| C | 33.917673 | 30.565062 | 39.085094 |
| H | 33.662566 | 31.622176 | 38.905870 |
| H | 33.228010 | 29.949562 | 38.475154 |
| C | 33.690148 | 30.299321 | 40.549708 |
| N | 34.207441 | 29.248940 | 41.296494 |
| C | 32.866449 | 31.039952 | 41.379044 |
| H | 32.297923 | 31.941840 | 41.161242 |
| C | 33.720424 | 29.359426 | 42.534947 |
| H | 33.954497 | 28.697572 | 43.370609 |
| N | 32.899789 | 30.440517 | 42.624192 |
| H | 32.360070 | 30.751366 | 43.451279 |
| C | 35.390934 | 30.928151 | 37.101410 |
| O | 35.463341 | 32.151901 | 36.938199 |
| N | 35.323448 | 30.020074 | 36.097070 |
| H | 35.128271 | 29.043711 | 36.335345 |
| C | 34.952342 | 30.367069 | 34.736738 |
| H | 34.836537 | 31.471690 | 34.706394 |
| C | 36.033653 | 29.983018 | 33.694893 |
| H | 35.607488 | 30.047605 | 32.668991 |
| H | 36.872799 | 30.700832 | 33.704642 |
| C | 36.525264 | 28.553282 | 33.902433 |
| O | 35.753551 | 27.713120 | 34.412214 |
| N | 37.773194 | 28.227505 | 33.512964 |
| H | 38.474088 | 28.874204 | 33.138776 |
| H | 38.060363 | 27.237308 | 33.616884 |
| C | 33.530208 | 29.759864 | 34.420548 |
| O | 32.955402 | 29.139054 | 35.305415 |
| C | 30.753765 | 24.278980 | 33.953746 |
| H | 30.118882 | 24.387944 | 34.850182 |
| C | 31.955652 | 25.171274 | 34.150528 |
| O | 32.331340 | 26.022955 | 33.336700 |
| N | 32.579739 | 24.967241 | 35.355693 |
| H | 32.123475 | 24.324529 | 36.005926 |
| C | 33.702672 | 25.717936 | 35.882716 |
| H | 33.909490 | 26.548928 | 35.185976 |
| C | 33.256041 | 26.225769 | 37.262832 |
| H | 32.402924 | 26.910046 | 37.118361 |
| H | 32.854754 | 25.348681 | 37.814932 |
| C | 34.199466 | 26.869945 | 38.244386 |
| O | 35.443906 | 26.626193 | 38.361775 |
| O | 33.645643 | 27.635345 | 39.112410 |
| C | 34.881298 | 24.739141 | 35.959775 |
| O | 34.776969 | 23.695298 | 36.629002 |
| N | 35.967072 | 25.063612 | 35.210043 |
| H | 36.005833 | 26.004972 | 34.761539 |
| C | 37.105563 | 24.189937 | 35.168556 |
| H | 36.746046 | 23.156285 | 35.341309 |
| C | 38.179404 | 24.417549 | 36.250235 |
| O | 39.233918 | 23.776922 | 36.247494 |
| N | 37.861183 | 25.290197 | 37.259457 |
| H | 36.918119 | 25.693964 | 37.354729 |
| C | 38.777894 | 25.399904 | 38.361228 |
| H | 39.779890 | 25.591135 | 37.956455 |
| C | 37.342666 | 20.332872 | 41.663446 |
| H | 37.227397 | 19.233115 | 41.576106 |
| H | 37.638475 | 20.480949 | 42.723795 |
| C | 35.955723 | 20.930648 | 41.532252 |
| O | 34.910702 | 20.395211 | 41.951868 |
| N | 35.878475 | 22.183704 | 40.966135 |
| H | 36.730007 | 22.631839 | 40.610855 |
| C | 34.671636 | 22.979098 | 41.121004 |
| H | 34.294472 | 22.870971 | 42.160287 |

|    |           |           |           |
|----|-----------|-----------|-----------|
| C  | 34.957511 | 24.461007 | 40.842361 |
| H  | 35.462139 | 24.571300 | 39.860016 |
| H  | 33.984653 | 24.975269 | 40.741630 |
| C  | 35.743367 | 25.166504 | 41.915032 |
| N  | 35.900991 | 26.550699 | 41.869212 |
| C  | 36.388723 | 24.695453 | 43.048877 |
| H  | 36.511467 | 23.686649 | 43.443202 |
| C  | 36.619539 | 26.901894 | 42.941107 |
| H  | 36.956420 | 27.911284 | 43.176585 |
| N  | 36.926476 | 25.805418 | 43.680999 |
| H  | 37.530523 | 25.791290 | 44.518887 |
| C  | 33.509807 | 22.470506 | 40.230699 |
| O  | 32.364564 | 22.778576 | 40.593643 |
| C  | 29.212048 | 21.827166 | 41.920998 |
| H  | 28.279079 | 21.277460 | 42.145694 |
| C  | 28.745521 | 22.953433 | 41.028342 |
| O  | 27.539083 | 23.236020 | 40.868629 |
| N  | 29.707132 | 23.699336 | 40.381031 |
| H  | 30.676251 | 23.354622 | 40.380075 |
| C  | 29.382822 | 24.816720 | 39.505946 |
| H  | 28.374826 | 25.163957 | 39.808290 |
| C  | 30.402814 | 25.956760 | 39.561617 |
| H  | 31.382563 | 25.567436 | 39.230825 |
| H  | 30.111218 | 26.703885 | 38.801851 |
| C  | 30.534819 | 26.633623 | 40.949239 |
| H  | 29.688602 | 26.288876 | 41.572633 |
| C  | 31.822487 | 26.185545 | 41.646715 |
| H  | 31.921145 | 26.654664 | 42.640855 |
| H  | 31.861306 | 25.087354 | 41.768925 |
| H  | 32.697134 | 26.513004 | 41.055269 |
| C  | 30.480223 | 28.167218 | 40.842422 |
| H  | 30.560742 | 28.644258 | 41.840590 |
| H  | 31.314639 | 28.538667 | 40.217396 |
| H  | 29.533847 | 28.507451 | 40.384829 |
| C  | 29.259534 | 24.189795 | 38.079870 |
| O  | 30.256380 | 24.144537 | 37.356023 |
| H  | 39.111145 | 30.291785 | 44.655877 |
| H  | 37.516433 | 30.780990 | 45.254538 |
| H  | 33.176608 | 29.990473 | 33.490426 |
| H  | 30.243721 | 24.628068 | 33.042560 |
| H  | 31.009132 | 23.218942 | 33.872308 |
| H  | 37.608863 | 24.197127 | 34.197906 |
| H  | 38.532620 | 26.212907 | 39.049988 |
| H  | 38.836690 | 24.425812 | 38.869009 |
| H  | 38.170062 | 20.673110 | 41.021634 |
| H  | 33.732823 | 21.886049 | 39.423225 |
| H  | 29.958479 | 21.126851 | 41.515207 |
| H  | 29.536721 | 22.170452 | 42.907034 |
| H  | 28.354010 | 23.790750 | 37.826630 |
| Cu | 35.152648 | 27.712794 | 40.425016 |

#### C112D/M121L: QM/MM Monodentate

|   |           |           |           |
|---|-----------|-----------|-----------|
| C | 38.029545 | 30.235725 | 44.457716 |
| H | 37.683376 | 29.187359 | 44.483737 |
| C | 37.677087 | 30.850638 | 43.118811 |
| O | 36.629399 | 31.473530 | 42.842431 |
| N | 38.618280 | 30.704188 | 42.136442 |
| H | 39.420004 | 30.089680 | 42.271174 |
| C | 38.307544 | 31.154131 | 40.800953 |
| H | 38.033516 | 32.222470 | 40.819662 |
| H | 39.202147 | 31.037814 | 40.163297 |
| C | 37.175765 | 30.325955 | 40.191213 |
| O | 37.108454 | 29.107255 | 40.440448 |
| N | 36.344096 | 30.979579 | 39.348272 |
| H | 36.443861 | 32.000431 | 39.209379 |

|   |           |           |           |
|---|-----------|-----------|-----------|
| C | 35.386531 | 30.266051 | 38.519256 |
| H | 35.683300 | 29.201584 | 38.527325 |
| C | 33.903030 | 30.419395 | 38.973443 |
| H | 33.555105 | 31.414756 | 38.648170 |
| H | 33.310550 | 29.675396 | 38.404195 |
| C | 33.607535 | 30.317598 | 40.442088 |
| N | 34.090382 | 29.341364 | 41.297176 |
| C | 32.767343 | 31.143214 | 41.171226 |
| H | 32.231635 | 32.037340 | 40.854803 |
| C | 33.567348 | 29.571449 | 42.505674 |
| H | 33.772324 | 28.996102 | 43.410657 |
| N | 32.757891 | 30.660287 | 42.468321 |
| H | 32.206952 | 31.022916 | 43.267528 |
| C | 35.453689 | 30.847049 | 37.094932 |
| O | 35.519421 | 32.074017 | 36.932863 |
| N | 35.358083 | 29.944374 | 36.089662 |
| H | 35.283402 | 28.945887 | 36.323528 |
| C | 34.970831 | 30.321053 | 34.741094 |
| H | 34.865197 | 31.427972 | 34.743360 |
| C | 36.041461 | 29.964790 | 33.679771 |
| H | 35.609530 | 30.050801 | 32.658175 |
| H | 36.879442 | 30.683687 | 33.704858 |
| C | 36.528158 | 28.530761 | 33.861225 |
| O | 35.732477 | 27.680647 | 34.310265 |
| N | 37.792582 | 28.214805 | 33.519953 |
| H | 38.508560 | 28.864680 | 33.180893 |
| H | 38.071194 | 27.220645 | 33.614289 |
| C | 33.530208 | 29.759864 | 34.420548 |
| O | 32.921448 | 29.184370 | 35.310620 |
| C | 30.753765 | 24.278979 | 33.953745 |
| H | 30.112378 | 24.379890 | 34.847044 |
| C | 31.953974 | 25.176500 | 34.177795 |
| O | 32.367073 | 25.985908 | 33.337505 |
| N | 32.526988 | 25.042156 | 35.419769 |
| H | 32.069789 | 24.406150 | 36.076644 |
| C | 33.704027 | 25.742059 | 35.906493 |
| H | 33.916841 | 26.574013 | 35.213814 |
| C | 33.375890 | 26.238935 | 37.326052 |
| H | 32.544613 | 26.966164 | 37.262023 |
| H | 32.991382 | 25.381953 | 37.911966 |
| C | 34.503357 | 26.865743 | 38.149381 |
| O | 35.644961 | 27.075570 | 37.673159 |
| O | 34.130593 | 27.155044 | 39.350323 |
| C | 34.871097 | 24.737476 | 35.941628 |
| O | 34.762156 | 23.691123 | 36.608744 |
| N | 35.958617 | 25.055722 | 35.193760 |
| H | 35.997115 | 25.996341 | 34.743758 |
| C | 37.105563 | 24.189937 | 35.168556 |
| H | 36.751116 | 23.154615 | 35.341776 |
| C | 38.175859 | 24.412999 | 36.253974 |
| O | 39.212245 | 23.741377 | 36.268574 |
| N | 37.865603 | 25.292630 | 37.254433 |
| H | 36.993472 | 25.849299 | 37.250221 |
| C | 38.777894 | 25.399904 | 38.361228 |
| H | 39.784799 | 25.593269 | 37.967647 |
| C | 37.342667 | 20.332872 | 41.663446 |
| H | 37.241333 | 19.230623 | 41.586027 |
| H | 37.636117 | 20.489397 | 42.723495 |
| C | 35.952499 | 20.912443 | 41.531394 |
| O | 34.913001 | 20.376470 | 41.963466 |
| N | 35.869897 | 22.157702 | 40.953196 |
| H | 36.721412 | 22.605819 | 40.597663 |
| C | 34.671935 | 22.959517 | 41.128554 |
| H | 34.294303 | 22.823716 | 42.164557 |
| C | 34.987578 | 24.442959 | 40.903959 |
| H | 35.501556 | 24.572626 | 39.927998 |
| H | 34.036353 | 24.994372 | 40.814155 |

|    |           |           |           |
|----|-----------|-----------|-----------|
| C  | 35.798774 | 25.070096 | 42.006864 |
| N  | 35.998024 | 26.447725 | 42.031433 |
| C  | 36.440262 | 24.523306 | 43.109544 |
| H  | 36.542313 | 23.492266 | 43.447458 |
| C  | 36.731801 | 26.723040 | 43.117349 |
| H  | 37.094415 | 27.708305 | 43.411677 |
| N  | 37.011686 | 25.583819 | 43.794538 |
| H  | 37.627547 | 25.534025 | 44.627599 |
| C  | 33.509807 | 22.470506 | 40.230699 |
| O  | 32.364252 | 22.781947 | 40.590848 |
| C  | 29.212048 | 21.827166 | 41.920998 |
| H  | 28.278353 | 21.278186 | 42.143919 |
| C  | 28.750102 | 22.951917 | 41.024940 |
| O  | 27.544576 | 23.231910 | 40.853260 |
| N  | 29.714236 | 23.702163 | 40.382779 |
| H  | 30.685779 | 23.361841 | 40.387197 |
| C  | 29.385777 | 24.816827 | 39.509337 |
| H  | 28.375131 | 25.157414 | 39.810056 |
| C  | 30.396097 | 25.965819 | 39.556116 |
| H  | 31.377275 | 25.594752 | 39.209854 |
| H  | 30.081316 | 26.711528 | 38.804281 |
| C  | 30.533763 | 26.640545 | 40.943811 |
| H  | 29.682419 | 26.307367 | 41.566481 |
| C  | 31.819830 | 26.183597 | 41.639378 |
| H  | 31.927244 | 26.659577 | 42.630040 |
| H  | 31.845288 | 25.086183 | 41.771447 |
| H  | 32.691301 | 26.489940 | 41.032718 |
| C  | 30.490215 | 28.174086 | 40.834587 |
| H  | 30.582118 | 28.651651 | 41.831384 |
| H  | 31.323084 | 28.543557 | 40.205465 |
| H  | 29.543827 | 28.521960 | 40.382734 |
| C  | 29.259534 | 24.189795 | 38.079870 |
| O  | 30.251751 | 24.141672 | 37.353501 |
| H  | 39.111145 | 30.291784 | 44.655877 |
| H  | 37.516433 | 30.780990 | 45.254538 |
| H  | 33.176608 | 29.990473 | 33.490426 |
| H  | 30.243721 | 24.628068 | 33.042560 |
| H  | 31.009132 | 23.218942 | 33.872309 |
| H  | 37.608863 | 24.197127 | 34.197906 |
| H  | 38.532620 | 26.212907 | 39.049988 |
| H  | 38.836690 | 24.425812 | 38.869009 |
| H  | 38.170062 | 20.673110 | 41.021634 |
| H  | 33.732824 | 21.886049 | 39.423225 |
| H  | 29.958479 | 21.126851 | 41.515207 |
| H  | 29.536721 | 22.170452 | 42.907034 |
| H  | 28.354010 | 23.790750 | 37.826630 |
| Cu | 35.206507 | 27.801843 | 40.869280 |

#### C112D/M121L: SORCI (QM/MM Monodentate)

|   |          |           |           |
|---|----------|-----------|-----------|
| C | 0.924631 | -0.300740 | 3.123839  |
| O | 0.000737 | 0.006085  | 2.346571  |
| N | 1.729160 | -1.376515 | 2.966000  |
| H | 2.437702 | -1.554671 | 3.680105  |
| C | 1.469616 | -2.376965 | 1.943725  |
| C | 2.463230 | -2.341862 | 0.742855  |
| H | 3.408550 | -2.839127 | 1.035174  |
| H | 2.026137 | -2.972467 | -0.057494 |
| C | 2.831242 | -0.999718 | 0.179094  |
| N | 1.944011 | 0.018192  | -0.127516 |
| C | 4.101796 | -0.577218 | -0.176419 |
| H | 5.070595 | -1.073973 | -0.098276 |
| C | 2.652946 | 1.026948  | -0.644033 |
| H | 2.249305 | 1.976639  | -1.002605 |
| N | 3.969938 | 0.701809  | -0.688728 |
| H | 4.722328 | 1.291440  | -1.045767 |

|    |           |           |           |
|----|-----------|-----------|-----------|
| C  | -1.059267 | -3.774979 | -1.707907 |
| C  | -0.961407 | -2.729156 | -0.594976 |
| O  | -1.480152 | -2.900884 | 0.534402  |
| O  | -0.283393 | -1.692160 | -0.955309 |
| C  | -2.342218 | 1.448629  | -1.244693 |
| N  | -1.299950 | 1.428969  | -0.321949 |
| C  | -2.906238 | 2.716706  | -1.229066 |
| H  | -3.739553 | 3.144177  | -1.789416 |
| C  | -1.234479 | 2.648058  | 0.228471  |
| H  | -0.549617 | 2.950739  | 1.023631  |
| N  | -2.186901 | 3.452640  | -0.300944 |
| H  | -2.366315 | 4.422201  | -0.037235 |
| Cu | -0.000864 | 0.007940  | 0.000212  |
| H  | -2.608901 | 0.571751  | -1.836526 |
| H  | 1.517990  | -3.381679 | 2.403641  |
| H  | 0.426522  | -2.240610 | 1.608954  |
| H  | -1.632623 | -4.647089 | -1.344882 |
| H  | -0.051149 | -4.102115 | -2.025319 |
| H  | -1.563025 | -3.347769 | -2.595348 |
| H  | 1.150858  | 0.308265  | 4.029901  |

C112D/M121F: X-ray Diffraction

|   |           |           |           |
|---|-----------|-----------|-----------|
| C | 4.666106  | 6.640402  | 2.786158  |
| C | 4.167011  | 6.357741  | 1.336368  |
| O | 3.059386  | 6.768176  | 0.968836  |
| N | 4.954172  | 5.580671  | 0.571499  |
| C | 4.568199  | 5.267788  | -0.814612 |
| C | 3.403818  | 4.266241  | -0.836086 |
| O | 3.266432  | 3.433653  | 0.078808  |
| N | 2.559716  | 4.314472  | -1.859209 |
| C | 1.551101  | 3.248167  | -1.983193 |
| C | 1.613935  | 2.722302  | -3.428845 |
| O | 1.912229  | 3.496938  | -4.379238 |
| C | 0.085667  | 3.711090  | -1.782830 |
| C | -0.170516 | 4.560657  | -0.557848 |
| N | 0.166038  | 4.177812  | 0.738363  |
| C | -0.847894 | 5.730568  | -0.445080 |
| C | -0.253897 | 5.108518  | 1.586915  |
| N | -0.853022 | 6.074736  | 0.887929  |
| N | 1.360173  | 1.421838  | -3.587063 |
| C | 1.073249  | 0.848734  | -4.908127 |
| C | -0.226872 | 0.095987  | -4.843605 |
| O | -0.818684 | -0.044324 | -3.741951 |
| C | 2.230698  | -0.031912 | -5.517058 |
| C | 2.703358  | -1.131896 | -4.537195 |
| O | 2.000269  | -1.373430 | -3.573430 |
| N | 3.842487  | -1.855407 | -4.842634 |
| C | -3.013206 | -4.559746 | -1.833222 |
| C | -1.826706 | -3.692044 | -2.216181 |
| O | -1.408064 | -3.658890 | -3.361958 |
| N | -1.301341 | -3.012191 | -1.183304 |
| C | -0.128114 | -2.148497 | -1.214245 |
| C | 1.051782  | -2.956519 | -0.652006 |
| O | 0.927934  | -3.554752 | 0.485536  |
| C | -0.443823 | -1.044060 | -0.284408 |
| C | 0.559573  | 0.084580  | -0.276235 |
| O | 1.693455  | -0.009291 | -0.802853 |
| O | 0.166190  | 1.101941  | 0.341509  |
| N | 2.148215  | -3.036747 | -1.397508 |
| C | 3.285012  | -3.844617 | -0.883180 |
| C | 4.373739  | -2.992986 | -0.186976 |
| O | 5.434354  | -3.532451 | 0.196281  |
| N | 4.155532  | -1.689405 | -0.013773 |
| C | 5.080850  | -0.891517 | 0.803578  |
| C | 3.475780  | -2.869154 | 6.582279  |
| C | 2.121900  | -2.412260 | 6.084390  |



|    |           |           |           |
|----|-----------|-----------|-----------|
| O  | 1.133247  | -2.584882 | 6.764942  |
| N  | 2.061508  | -1.903674 | 4.845971  |
| C  | 0.862817  | -1.216988 | 4.402422  |
| C  | -0.215283 | -2.218565 | 4.033767  |
| O  | -1.418489 | -1.854722 | 3.974762  |
| C  | 1.177724  | -0.222717 | 3.229625  |
| C  | 1.912053  | 0.990756  | 3.675601  |
| N  | 2.078789  | 2.105980  | 2.884460  |
| C  | 2.541580  | 1.272161  | 4.851117  |
| C  | 2.779417  | 3.011904  | 3.524623  |
| N  | 3.090724  | 2.526364  | 4.717589  |
| C  | -4.345353 | -1.591736 | 6.320123  |
| C  | -4.941211 | -1.417479 | 4.910848  |
| O  | -6.141372 | -1.216757 | 4.801906  |
| N  | -4.128428 | -1.484701 | 3.848967  |
| C  | -4.744139 | -1.313644 | 2.511724  |
| C  | -4.726262 | -2.534269 | 1.682170  |
| O  | -3.678111 | -2.862223 | 1.067845  |
| C  | -4.119536 | -0.223400 | 1.659565  |
| C  | -4.723471 | -0.191099 | 0.235897  |
| C  | -4.004873 | -0.637210 | -0.853879 |
| C  | -6.029757 | 0.225934  | 0.031797  |
| C  | -4.544556 | -0.611284 | -2.154697 |
| C  | -6.602402 | 0.240813  | -1.248985 |
| C  | -5.847825 | -0.175267 | -2.353749 |
| Cu | 1.242344  | 2.579274  | 1.143541  |
| H  | -3.000289 | -1.049570 | -0.715351 |
| H  | -3.921860 | -0.945955 | -3.001168 |
| H  | -6.287657 | -0.158832 | -3.365236 |
| H  | -7.642555 | 0.582871  | -1.379647 |
| H  | -6.635370 | 0.575606  | 0.887765  |
| H  | -3.023891 | -0.385862 | 1.585336  |
| H  | -4.275148 | 0.758700  | 2.160553  |
| H  | -5.801120 | -1.059746 | 2.744252  |
| H  | -5.638022 | -3.188704 | 1.623800  |
| H  | -3.135895 | -1.749573 | 3.915800  |
| H  | -3.236275 | -1.655441 | 6.331660  |
| H  | -4.769792 | -2.515296 | 6.768811  |
| H  | -4.679236 | -0.735615 | 6.942321  |
| H  | 3.096306  | 3.985041  | 3.129514  |
| H  | 3.620550  | 3.009389  | 5.449205  |
| H  | 2.674420  | 0.690212  | 5.769664  |
| H  | 1.735616  | -0.756487 | 2.424186  |
| H  | 0.213326  | 0.086283  | 2.771242  |
| H  | 0.435800  | -0.636316 | 5.251315  |
| H  | 0.097120  | -3.271525 | 3.803607  |
| H  | 2.917305  | -1.798486 | 4.294299  |
| H  | 4.328257  | -2.652318 | 5.901954  |
| H  | 3.435858  | -3.964804 | 6.762786  |
| H  | 3.670364  | -2.393743 | 7.567576  |
| H  | 4.931184  | 7.716825  | 2.873439  |
| H  | 3.819552  | 6.460288  | 3.480812  |
| H  | 5.547190  | 6.035857  | 3.093698  |
| H  | 5.846394  | 5.229777  | 0.922989  |
| H  | 5.445506  | 4.818974  | -1.327424 |
| H  | 4.285761  | 6.201641  | -1.346764 |
| H  | 2.709026  | 4.887075  | -2.700954 |
| H  | 1.818826  | 2.444293  | -1.269161 |
| H  | -0.230108 | 4.300125  | -2.670308 |
| H  | -0.548746 | 2.798164  | -1.745026 |
| H  | 1.240016  | 0.800381  | -2.769954 |
| H  | 0.958592  | 1.712621  | -5.604275 |
| H  | -0.632833 | -0.348653 | -5.793245 |
| H  | 3.072561  | 0.635038  | -5.807123 |
| H  | 1.872913  | -0.516414 | -6.455454 |
| H  | -1.418332 | -0.588388 | -0.539455 |
| H  | -0.539305 | -1.433875 | 0.754549  |

|   |           |           |           |
|---|-----------|-----------|-----------|
| H | 0.043700  | -1.822277 | -2.257584 |
| H | 2.210381  | -2.490201 | -2.281600 |
| H | 3.763152  | -4.416492 | -1.705876 |
| H | 2.877546  | -4.554197 | -0.136061 |
| H | 3.271864  | -1.250625 | -0.334086 |
| H | 6.110464  | -0.939639 | 0.387718  |
| H | 4.725616  | 0.158852  | 0.805506  |
| H | 5.128514  | -1.280611 | 1.846009  |
| H | -1.687179 | -3.201411 | -0.249909 |
| H | -2.681342 | -5.621023 | -1.779491 |
| H | -3.776485 | -4.496299 | -2.636118 |
| H | -3.463928 | -4.268452 | -0.860683 |
| H | -1.297304 | 6.383535  | -1.202652 |
| H | -1.274072 | 6.924567  | 1.273649  |
| H | -0.124035 | 5.109458  | 2.675637  |
| H | 4.431889  | -1.626173 | -5.646378 |
| H | 4.137485  | -2.613435 | -4.221159 |

C112D/M121F: QM/MM Bidentate

|   |           |           |           |
|---|-----------|-----------|-----------|
| C | 39.073276 | 39.559252 | 37.260771 |
| H | 38.975166 | 38.637549 | 37.864209 |
| C | 38.593933 | 39.236008 | 35.868875 |
| O | 37.571344 | 39.670679 | 35.323112 |
| N | 39.398861 | 38.368223 | 35.159441 |
| H | 40.205277 | 37.920192 | 35.591849 |
| C | 39.025813 | 38.007594 | 33.817409 |
| H | 38.803339 | 38.923742 | 33.246276 |
| H | 39.872684 | 37.488522 | 33.330949 |
| C | 37.805987 | 37.077336 | 33.758922 |
| O | 37.600043 | 36.285173 | 34.700762 |
| N | 37.072831 | 37.133876 | 32.621314 |
| H | 37.289944 | 37.873899 | 31.929707 |
| C | 36.003159 | 36.190225 | 32.328378 |
| H | 36.077574 | 35.380344 | 33.074965 |
| C | 34.584525 | 36.817409 | 32.366667 |
| H | 34.506843 | 37.555404 | 31.545339 |
| H | 33.870963 | 35.999677 | 32.127847 |
| C | 34.215278 | 37.469585 | 33.660890 |
| N | 34.449923 | 36.891352 | 34.904119 |
| C | 33.574566 | 38.683779 | 33.851755 |
| H | 33.248625 | 39.449383 | 33.147175 |
| C | 33.951013 | 37.736981 | 35.810166 |
| H | 33.908569 | 37.583390 | 36.881326 |
| N | 33.423649 | 38.829772 | 35.216301 |
| H | 33.058194 | 39.643420 | 35.727474 |
| C | 36.140264 | 35.610461 | 30.912946 |
| O | 36.293752 | 36.366440 | 29.948789 |
| N | 35.971245 | 34.264896 | 30.813014 |
| H | 35.775993 | 33.724914 | 31.664998 |
| C | 35.627301 | 33.639388 | 29.546899 |
| H | 35.523893 | 34.471705 | 28.815305 |
| C | 36.740149 | 32.733140 | 28.959411 |
| H | 36.325642 | 32.197926 | 28.075973 |
| H | 37.562384 | 33.358903 | 28.569610 |
| C | 37.236627 | 31.697467 | 29.963883 |
| O | 36.419750 | 31.210802 | 30.771953 |
| N | 38.534011 | 31.316857 | 29.921181 |
| H | 39.249309 | 31.716282 | 29.303038 |
| H | 38.834136 | 30.560176 | 30.562136 |
| C | 34.200804 | 32.990615 | 29.641828 |
| O | 33.581851 | 33.044663 | 30.703079 |
| C | 31.427470 | 28.336863 | 32.689449 |
| H | 30.762009 | 28.898755 | 33.375239 |
| C | 32.527983 | 29.279952 | 32.268942 |
| O | 32.619923 | 29.706936 | 31.112637 |

|   |           |           |           |
|---|-----------|-----------|-----------|
| N | 33.368089 | 29.697840 | 33.276288 |
| H | 33.138933 | 29.391891 | 34.224197 |
| C | 34.345508 | 30.783279 | 33.193534 |
| H | 34.531348 | 30.984358 | 32.124840 |
| C | 33.737363 | 32.007154 | 33.910943 |
| H | 32.995981 | 32.458973 | 33.224319 |
| H | 33.176982 | 31.650090 | 34.793767 |
| C | 34.601239 | 33.141222 | 34.406776 |
| O | 35.771726 | 33.403323 | 34.001671 |
| O | 34.041368 | 33.904891 | 35.286791 |
| C | 35.594821 | 30.243885 | 33.899039 |
| O | 35.626387 | 30.211154 | 35.147672 |
| N | 36.556379 | 29.738300 | 33.088089 |
| H | 36.582299 | 30.078384 | 32.100740 |
| C | 37.712749 | 29.056544 | 33.615798 |
| H | 37.406289 | 28.410240 | 34.459453 |
| C | 38.854014 | 29.983846 | 34.181265 |
| O | 39.983647 | 29.556090 | 34.342394 |
| N | 38.531567 | 31.279141 | 34.566484 |
| H | 37.567052 | 31.613801 | 34.532317 |
| C | 39.504120 | 32.041035 | 35.333324 |
| H | 40.489287 | 31.898085 | 34.874347 |
| C | 37.882658 | 30.059635 | 41.087238 |
| H | 37.850816 | 29.172615 | 41.754018 |
| H | 38.147056 | 30.909712 | 41.747486 |
| C | 36.494848 | 30.281712 | 40.526611 |
| O | 35.462224 | 29.769063 | 41.006036 |
| N | 36.458926 | 31.099234 | 39.427248 |
| H | 37.348864 | 31.403569 | 39.017392 |
| C | 35.233382 | 31.727669 | 38.954254 |
| H | 34.770912 | 32.323445 | 39.770659 |
| C | 35.487600 | 32.631550 | 37.740856 |
| H | 36.022121 | 32.059151 | 36.953820 |
| H | 34.512484 | 32.897629 | 37.293446 |
| C | 36.225961 | 33.880368 | 38.093570 |
| N | 36.457567 | 34.887571 | 37.167073 |
| C | 36.789202 | 34.248771 | 39.303781 |
| H | 36.820266 | 33.755492 | 40.275622 |
| C | 37.175430 | 35.827617 | 37.789273 |
| H | 37.586574 | 36.722818 | 37.317371 |
| N | 37.375448 | 35.479625 | 39.088386 |
| H | 37.899529 | 35.990245 | 39.804120 |
| C | 34.201401 | 30.695581 | 38.528707 |
| O | 33.012912 | 31.036197 | 38.539610 |
| C | 30.042792 | 31.345807 | 40.799365 |
| H | 29.178959 | 31.006759 | 41.383291 |
| C | 29.535640 | 31.197689 | 39.337249 |
| O | 28.549355 | 30.486268 | 39.069101 |
| N | 30.223812 | 31.779661 | 38.288788 |
| H | 31.195457 | 32.066048 | 38.431626 |
| C | 29.714626 | 31.780595 | 36.909429 |
| H | 28.663894 | 32.132529 | 36.951378 |
| C | 30.566207 | 32.748941 | 36.057912 |
| H | 30.555779 | 33.745585 | 36.542083 |
| H | 31.611381 | 32.386763 | 36.057258 |
| C | 30.041264 | 32.857405 | 34.638767 |
| C | 30.446932 | 31.980718 | 33.608991 |
| H | 31.189419 | 31.206831 | 33.817893 |
| C | 29.057248 | 33.818711 | 34.343375 |
| H | 28.747438 | 34.492846 | 35.148119 |
| C | 29.890366 | 32.066069 | 32.324935 |
| H | 30.255595 | 31.391771 | 31.538954 |
| C | 28.468703 | 33.892017 | 33.070852 |
| H | 27.676382 | 34.626753 | 32.875214 |
| C | 28.882770 | 33.007681 | 32.062875 |
| H | 28.395038 | 33.018868 | 31.084406 |
| C | 29.683124 | 30.365969 | 36.169644 |

|    |           |           |           |
|----|-----------|-----------|-----------|
| O  | 30.744661 | 29.888890 | 35.767551 |
| H  | 40.139010 | 39.830629 | 37.207535 |
| H  | 38.510457 | 40.375699 | 37.721393 |
| H  | 33.807889 | 32.690150 | 28.748140 |
| H  | 30.887551 | 28.049072 | 31.774064 |
| H  | 31.760065 | 27.451951 | 33.238844 |
| H  | 38.205845 | 28.436651 | 32.862065 |
| H  | 39.207436 | 33.093403 | 35.338194 |
| H  | 39.529648 | 31.620195 | 36.349393 |
| H  | 38.642656 | 29.955322 | 40.297435 |
| H  | 34.498769 | 29.757729 | 38.254213 |
| H  | 30.855036 | 30.603129 | 40.830292 |
| H  | 30.431294 | 32.293045 | 41.183201 |
| H  | 28.802806 | 29.849920 | 36.124111 |
| Cu | 35.506441 | 35.260055 | 35.417535 |

C112D/M121F: QM/MM Monodentate

|   |           |           |           |
|---|-----------|-----------|-----------|
| C | 39.073276 | 39.559252 | 37.260771 |
| H | 38.972637 | 38.636098 | 37.861590 |
| C | 38.594244 | 39.244462 | 35.868267 |
| O | 37.553351 | 39.656064 | 35.337907 |
| N | 39.421346 | 38.415219 | 35.143858 |
| H | 40.228079 | 37.966567 | 35.574747 |
| C | 39.022457 | 38.026337 | 33.817640 |
| H | 38.788071 | 38.929914 | 33.232773 |
| H | 39.859993 | 37.499263 | 33.323623 |
| C | 37.804111 | 37.095132 | 33.817071 |
| O | 37.600159 | 36.347261 | 34.792963 |
| N | 37.062148 | 37.099120 | 32.681802 |
| H | 37.269425 | 37.800897 | 31.951465 |
| C | 36.026040 | 36.109722 | 32.422558 |
| H | 36.168005 | 35.294792 | 33.156929 |
| C | 34.575777 | 36.669499 | 32.496931 |
| H | 34.425032 | 37.332999 | 31.623517 |
| H | 33.894698 | 35.803196 | 32.360477 |
| C | 34.209883 | 37.432167 | 33.730855 |
| N | 34.412092 | 36.974979 | 35.029112 |
| C | 33.576892 | 38.663886 | 33.796810 |
| H | 33.265775 | 39.361983 | 33.018585 |
| C | 33.902392 | 37.904386 | 35.845771 |
| H | 33.824991 | 37.851968 | 36.927682 |
| N | 33.402160 | 38.938109 | 35.137458 |
| H | 33.030627 | 39.796552 | 35.558788 |
| C | 36.149537 | 35.569927 | 30.985622 |
| O | 36.288284 | 36.359514 | 30.044277 |
| N | 35.986308 | 34.227728 | 30.845225 |
| H | 35.870271 | 33.647013 | 31.686617 |
| C | 35.634108 | 33.632557 | 29.566626 |
| H | 35.533676 | 34.482222 | 28.854706 |
| C | 36.741571 | 32.732601 | 28.959200 |
| H | 36.321081 | 32.204827 | 28.074013 |
| H | 37.561791 | 33.361704 | 28.570397 |
| C | 37.243680 | 31.690149 | 29.954092 |
| O | 36.429025 | 31.197480 | 30.759909 |
| N | 38.542151 | 31.313514 | 29.908972 |
| H | 39.257192 | 31.717271 | 29.293480 |
| H | 38.843562 | 30.556703 | 30.548860 |
| C | 34.200804 | 32.990615 | 29.641828 |
| O | 33.564514 | 33.051899 | 30.691584 |
| C | 31.427470 | 28.336863 | 32.689449 |
| H | 30.758771 | 28.894075 | 33.376555 |
| C | 32.520843 | 29.286735 | 32.272066 |
| O | 32.643080 | 29.672660 | 31.103549 |
| N | 33.311664 | 29.763124 | 33.290026 |
| H | 33.089629 | 29.463246 | 34.241732 |

|   |           |           |           |
|---|-----------|-----------|-----------|
| C | 34.349600 | 30.783284 | 33.176999 |
| H | 34.538079 | 30.952548 | 32.103925 |
| C | 33.852241 | 32.062267 | 33.879660 |
| H | 33.133876 | 32.569845 | 33.209042 |
| H | 33.298483 | 31.778350 | 34.792320 |
| C | 34.893046 | 33.094669 | 34.292774 |
| O | 36.058381 | 33.104837 | 33.834605 |
| O | 34.409835 | 33.960647 | 35.131423 |
| C | 35.570761 | 30.194972 | 33.890134 |
| O | 35.552892 | 30.095488 | 35.133534 |
| N | 36.558467 | 29.732726 | 33.085650 |
| H | 36.596835 | 30.096849 | 32.107683 |
| C | 37.712749 | 29.056544 | 33.615798 |
| H | 37.407968 | 28.413980 | 34.462421 |
| C | 38.848550 | 29.989909 | 34.183177 |
| O | 39.974378 | 29.554717 | 34.365727 |
| N | 38.525649 | 31.280780 | 34.569139 |
| H | 37.605236 | 31.694739 | 34.382450 |
| C | 39.504120 | 32.041035 | 35.333324 |
| H | 40.491699 | 31.899715 | 34.877583 |
| C | 37.882658 | 30.059635 | 41.087238 |
| H | 37.854460 | 29.175043 | 41.757299 |
| H | 38.144402 | 30.912455 | 41.744930 |
| C | 36.494891 | 30.277011 | 40.526917 |
| O | 35.461354 | 29.772751 | 41.012487 |
| N | 36.459030 | 31.085370 | 39.420458 |
| H | 37.348320 | 31.377620 | 38.999825 |
| C | 35.234817 | 31.723021 | 38.956137 |
| H | 34.775526 | 32.308157 | 39.782127 |
| C | 35.497166 | 32.650406 | 37.760474 |
| H | 36.042668 | 32.098128 | 36.966878 |
| H | 34.529130 | 32.927881 | 37.304920 |
| C | 36.240354 | 33.880944 | 38.166940 |
| N | 36.501652 | 34.928727 | 37.294645 |
| C | 36.793775 | 34.185096 | 39.398938 |
| H | 36.804184 | 33.645471 | 40.345912 |
| C | 37.229370 | 35.827418 | 37.970104 |
| H | 37.660617 | 36.737908 | 37.547152 |
| N | 37.404013 | 35.413479 | 39.251756 |
| H | 37.931008 | 35.873047 | 40.006945 |
| C | 34.201401 | 30.695580 | 38.528706 |
| O | 33.013890 | 31.040412 | 38.534124 |
| C | 30.042792 | 31.345807 | 40.799366 |
| H | 29.178802 | 31.006895 | 41.383133 |
| C | 29.534987 | 31.200221 | 39.338461 |
| O | 28.542207 | 30.498989 | 39.068962 |
| N | 30.231669 | 31.775428 | 38.291001 |
| H | 31.213930 | 32.025350 | 38.432011 |
| C | 29.727487 | 31.782765 | 36.910509 |
| H | 28.680627 | 32.146319 | 36.949142 |
| C | 30.597276 | 32.739796 | 36.064485 |
| H | 30.604679 | 33.733850 | 36.554242 |
| H | 31.634352 | 32.352988 | 36.062536 |
| C | 30.077238 | 32.862543 | 34.644902 |
| C | 30.511302 | 32.012086 | 33.605459 |
| H | 31.281085 | 31.262568 | 33.807114 |
| C | 29.067916 | 33.801347 | 34.361375 |
| H | 28.736996 | 34.457562 | 35.173226 |
| C | 29.950797 | 32.094340 | 32.322327 |
| H | 30.329954 | 31.436258 | 31.528901 |
| C | 28.480884 | 33.874419 | 33.088000 |
| H | 27.670087 | 34.590511 | 32.898745 |
| C | 28.918391 | 33.011884 | 32.070897 |
| H | 28.431359 | 33.025363 | 31.091850 |
| C | 29.683124 | 30.365969 | 36.169644 |
| O | 30.740240 | 29.884723 | 35.763815 |
| H | 40.139010 | 39.830629 | 37.207535 |

|    |           |           |           |
|----|-----------|-----------|-----------|
| H  | 38.510457 | 40.375699 | 37.721393 |
| H  | 33.807889 | 32.690150 | 28.748140 |
| H  | 30.887551 | 28.049072 | 31.774064 |
| H  | 31.760065 | 27.451951 | 33.238844 |
| H  | 38.205845 | 28.436651 | 32.862065 |
| H  | 39.207436 | 33.093403 | 35.338194 |
| H  | 39.529648 | 31.620195 | 36.349393 |
| H  | 38.642656 | 29.955322 | 40.297435 |
| H  | 34.498769 | 29.757729 | 38.254213 |
| H  | 30.855036 | 30.603129 | 40.830292 |
| H  | 30.431295 | 32.293045 | 41.183200 |
| H  | 28.802806 | 29.849920 | 36.124111 |
| Cu | 35.504826 | 35.473446 | 35.683932 |

C112D/M121F: SORCI (QM/MM Monodentate)

|    |           |           |           |
|----|-----------|-----------|-----------|
| C  | 0.788936  | -0.939710 | 3.264853  |
| O  | -0.029411 | -0.329525 | 2.552748  |
| N  | 1.391710  | -2.041664 | 2.835931  |
| C  | 0.945326  | -2.630992 | 1.561915  |
| C  | 1.987361  | -2.571810 | 0.416227  |
| C  | 2.638183  | -1.224821 | 0.192564  |
| N  | 1.930055  | -0.046662 | -0.032152 |
| C  | 3.950241  | -0.914320 | 0.043100  |
| C  | 2.790601  | 0.938257  | -0.260175 |
| N  | 4.026747  | 0.439306  | -0.196138 |
| C  | -2.171522 | -2.563067 | -2.383899 |
| C  | -1.648733 | -2.066855 | -1.056810 |
| O  | -2.161446 | -2.390701 | 0.040493  |
| O  | -0.685642 | -1.271389 | -1.162039 |
| C  | -2.148873 | 2.155375  | -0.620919 |
| N  | -1.118447 | 1.745368  | 0.196116  |
| C  | -2.391535 | 3.454603  | -0.288578 |
| C  | -0.758206 | 2.723850  | 0.992474  |
| N  | -1.526819 | 3.771645  | 0.733266  |
| Cu | -0.026702 | 0.084016  | 0.146605  |
| H  | -0.010489 | 2.670227  | 1.786719  |
| H  | -1.491416 | 4.676937  | 1.204560  |
| H  | -3.118623 | 4.177246  | -0.664800 |
| H  | -2.602595 | 1.507745  | -1.371492 |
| H  | 2.010229  | -2.568343 | 3.454784  |
| H  | 0.698086  | -3.695383 | 1.740897  |
| H  | -0.003992 | -2.146550 | 1.287743  |
| H  | 2.794699  | -3.305809 | 0.601997  |
| H  | 1.476981  | -2.893017 | -0.513178 |
| H  | 4.849599  | -1.529312 | 0.119124  |
| H  | 4.890677  | 0.958871  | -0.358332 |
| H  | 2.546139  | 1.981537  | -0.470931 |
| H  | -2.887641 | -1.824912 | -2.794932 |
| H  | -1.352121 | -2.682214 | -3.116217 |
| H  | -2.706306 | -3.522691 | -2.258873 |
| H  | 1.053807  | -0.605109 | 4.294681  |
